# Supplementary material for: Genome-wide identification and expression analyses of the homeobox transcription factor family during ovule development in seedless and seeded grapes
Source: PubMed Central journal article supplement (PMC5626728; doi:10.1038/s41598-017-12988-y), 2017-10-03
Supplement: 41598_2017_12988_MOESM1_ESM.pdf [file 41598_2017_12988_MOESM1_ESM.pdf]

**Genome-wide identification and expression analyses of the homeobox  
transcription factor family during ovule development in seedless and  
seeded grapes**

Yunduan Li<sup>1,2</sup>, Yanxun Zhu<sup>1,2</sup>, Jin Yao<sup>1,2</sup>, Songlin Zhang<sup>1,2</sup>, Li Wang<sup>1,2</sup>, Chunlei Guo<sup>1,2</sup>,  
Steve van Nocker<sup>3</sup>, Xiping Wang<sup>1,2\*</sup>

<sup>1</sup>State Key Laboratory of Crop Stress Biology in Arid Areas, College of Horticulture,  
Northwest A&F University, Yangling, Shaanxi, China

<sup>2</sup>Key Laboratory of Horticultural Plant Biology and Germplasm Innovation in  
Northwest China, Ministry of Agriculture, Northwest A&F University, Yangling,  
Shaanxi, China

<sup>3</sup>Department of Horticulture, Michigan State University, East Lansing, Michigan,  
USA

\* Corresponding author: Xiping Wang

College of Horticulture, Northwest A&F University,

Yangling 712100, Shaanxi, China

E-mail: [wangxiping@nwsuaf.edu.cn](mailto:wangxiping@nwsuaf.edu.cn)

Tel: 86-29-87082429

Fax: 86-29-87082613

E-mail addresses of all authors:

YL: yunduan.li@nwsuaf.edu.cn

YZ: yanxun.zhu@nwsuaf.edu.cn

JY: 2014014898@nwsuaf.edu.cn

SZ:18821636061@163.com

LW: valley2013060091@gmail.com

CG: guo0208chun@163.com

SVN: vannocke@msu.edu

Supplementary Figure S1: Alignment of the homeodomain in grape and *Arabidopsis*. Five highly conserved amino acids within the HD (Leu-16, Trp-48, Phe-49, Asn-51, and Arg-53) were indicated.

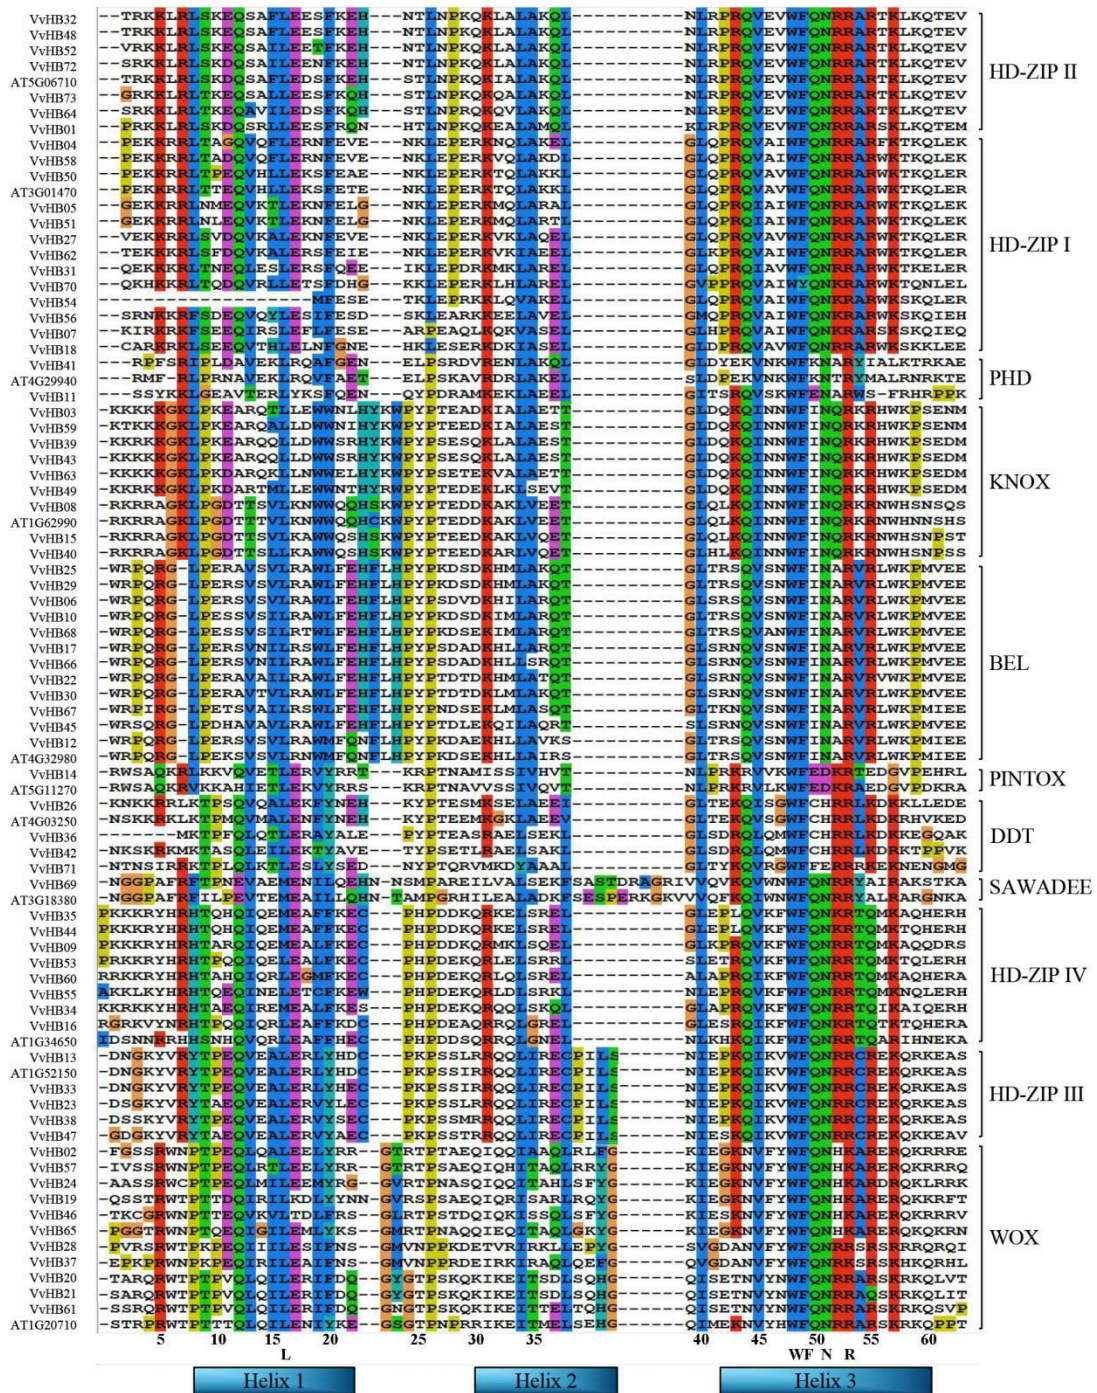



Supplementary Figure S2: Conserved motifs of *Arabidopsis* homeobox genes

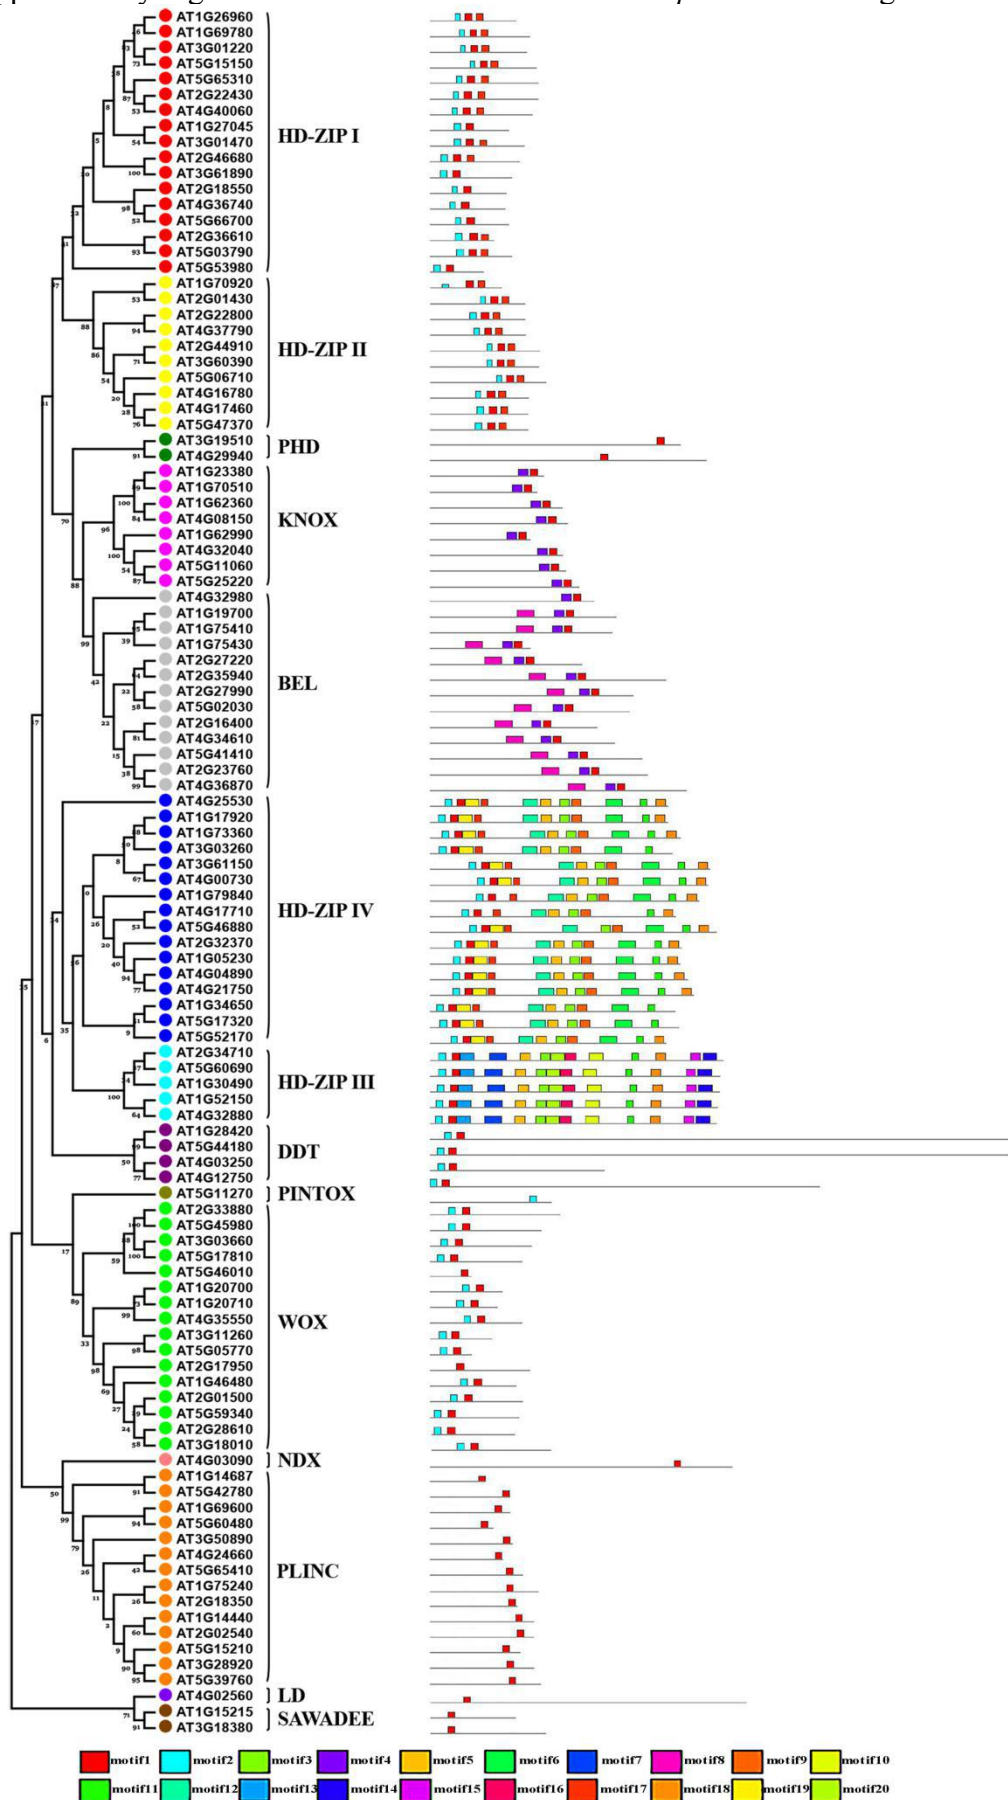

Supplementary Figure S3: Expression profiles of 33 *VvHB* genes in different grape organs measured by semi-quantitative RT-PCR. ‘Thompson Seedless’ is represented by ‘T.S’ and ‘Red Globe’ is represented by ‘R.G’. *Actin1* (GenBank Accession number NC\_012010) and *EF1- $\alpha$*  (GenBank Accession number NC\_012012) were used as internal controls. The grouping of each gene was cropped from different parts of the same gel, including all the tissues from two grape varieties. The exposures of bands in the same gel are consistent and exposures (ms) of each grouping are shown in the figure.

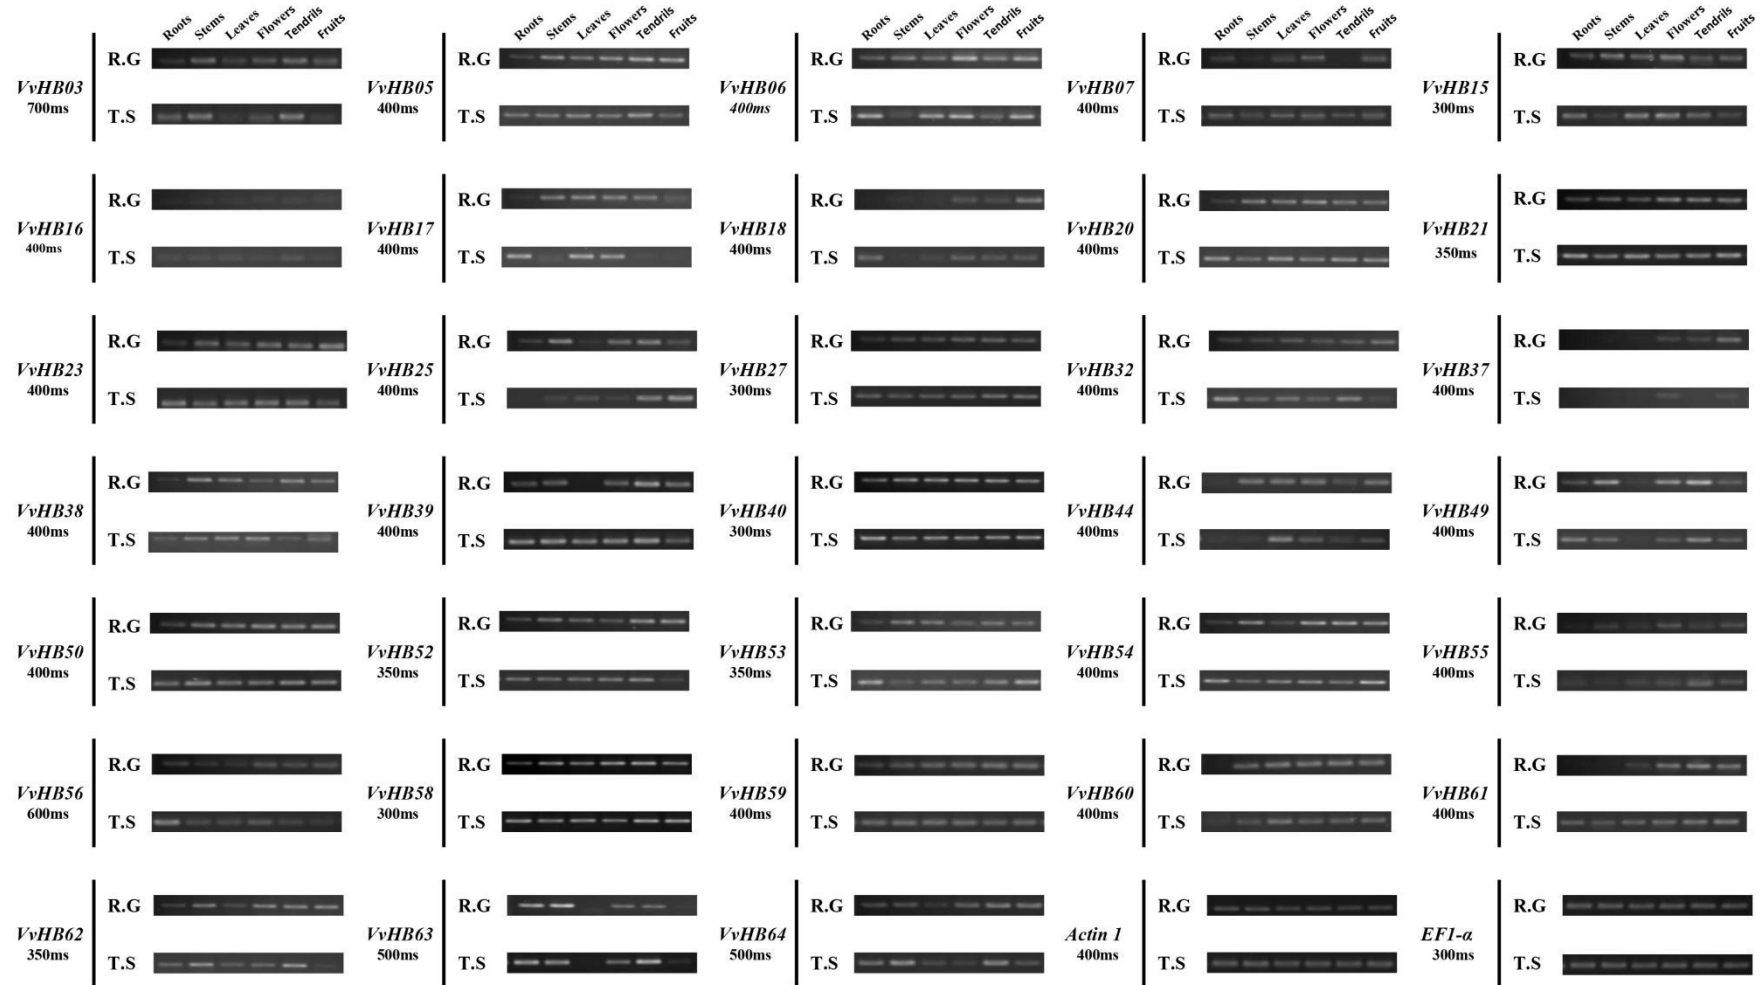

Supplementary Figure S4: Expression patterns of 33 *VvHB* genes in different developmental stages of ovules measured by semi-quantitative RT-PCR. Abbreviations: T.S, Thompson Seedless; R.G, Red Globe; K, Kyoho; F, Flame Seedless. *Actin1* (GenBank Accession number NC\_012010) and *EF1- $\alpha$*  (GenBank Accession number NC\_012012) were used as internal controls. The grouping of each gene was cropped from different parts of the same gel, including all ovule development stages from four grape varieties. The exposures of bands in the same gel are consistent and exposures (ms) of each grouping are shown in the figure.

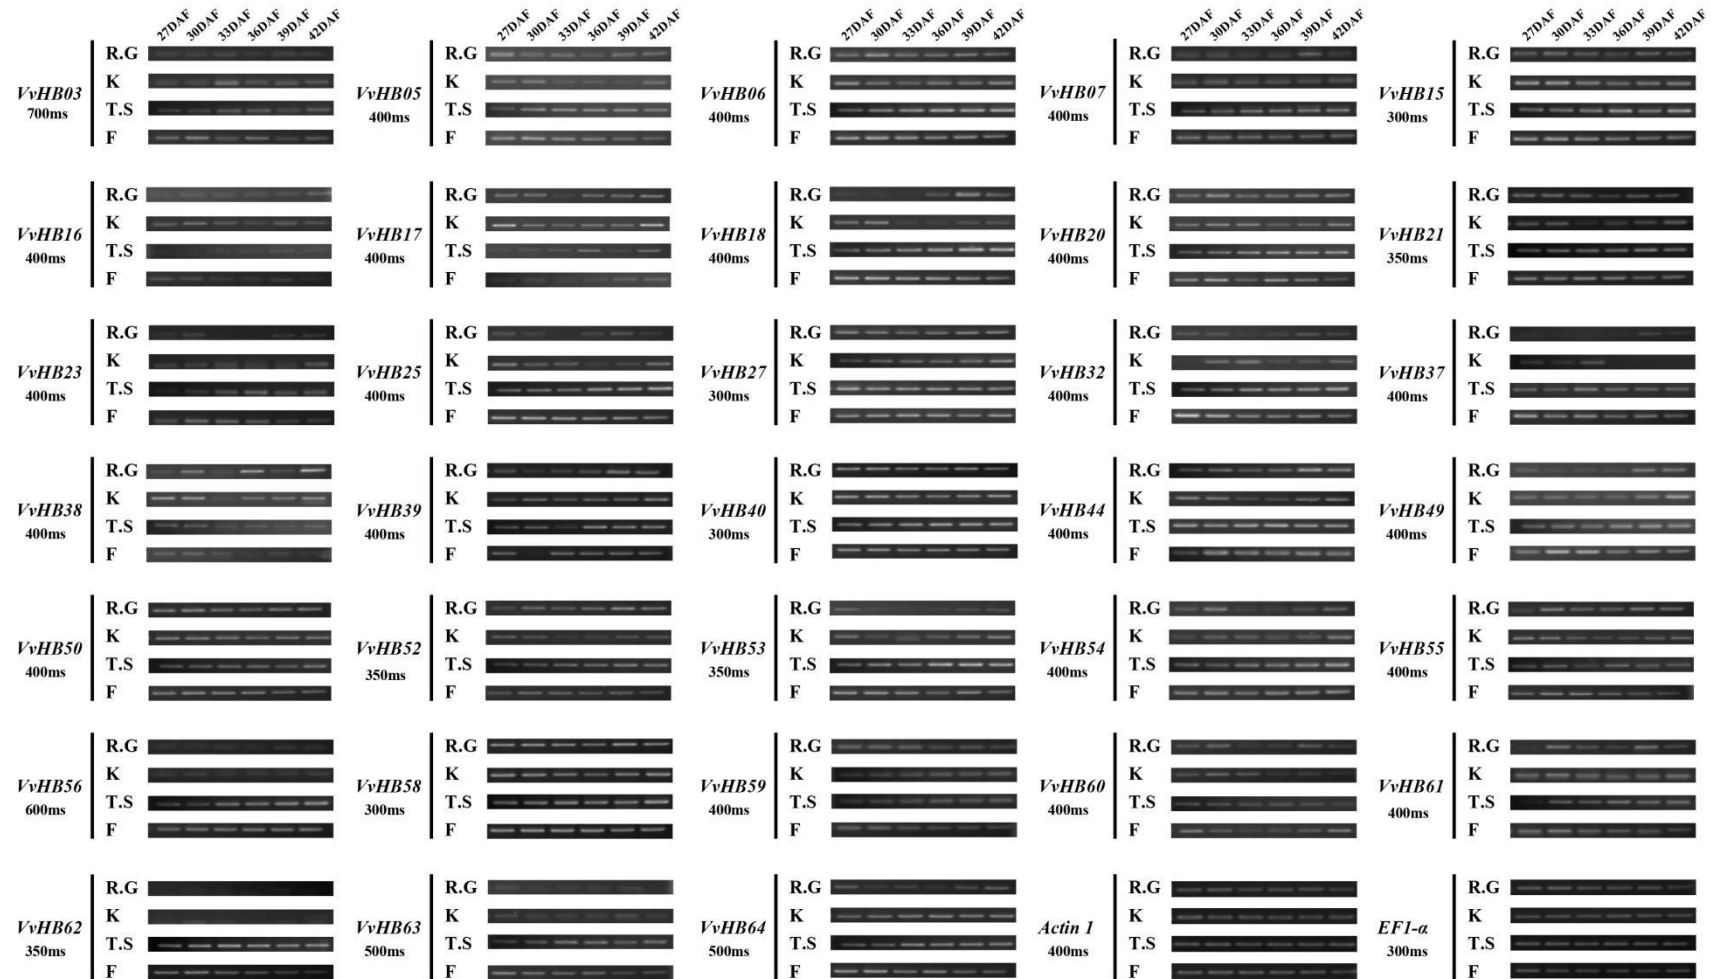

Supplementary Figure S5: The full-length gels of expression patterns performed by semi-quantitative RT-PCR. Abbreviations: T.S, Thompson Seedless; R.G, Red Globe; K, Kyoho; F, Flame Seedless. DAF, after full bloom.

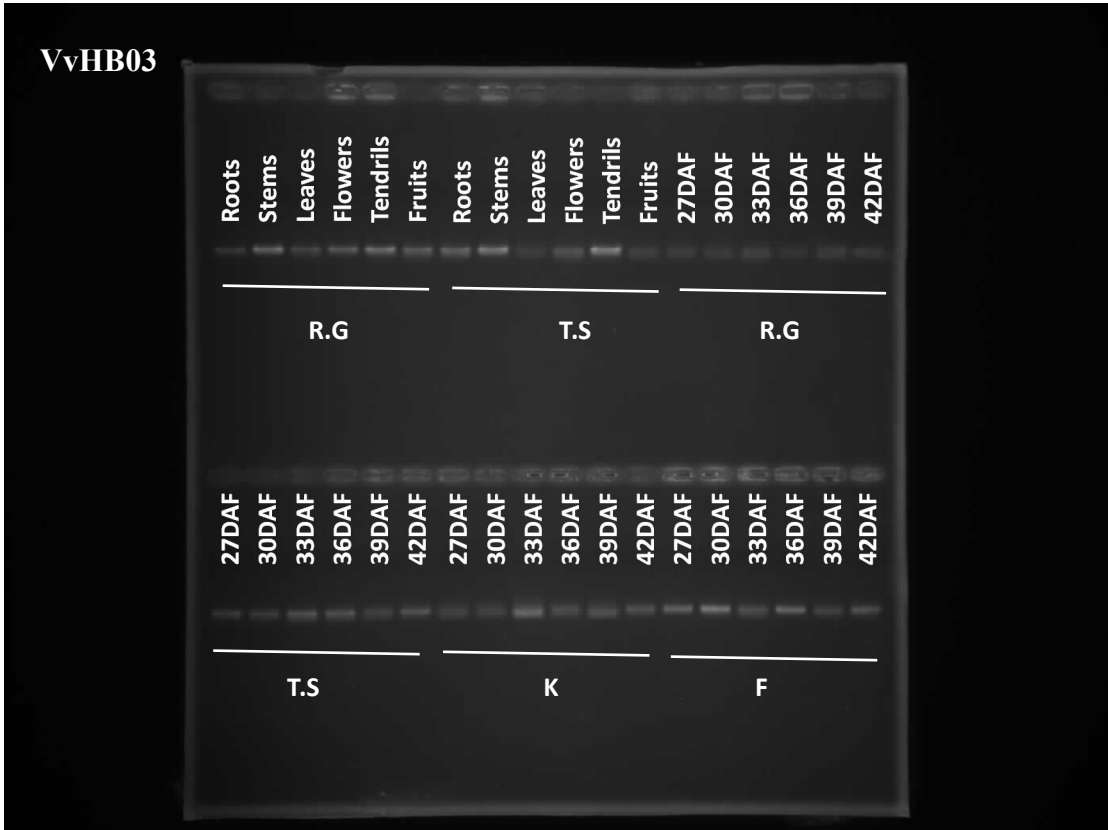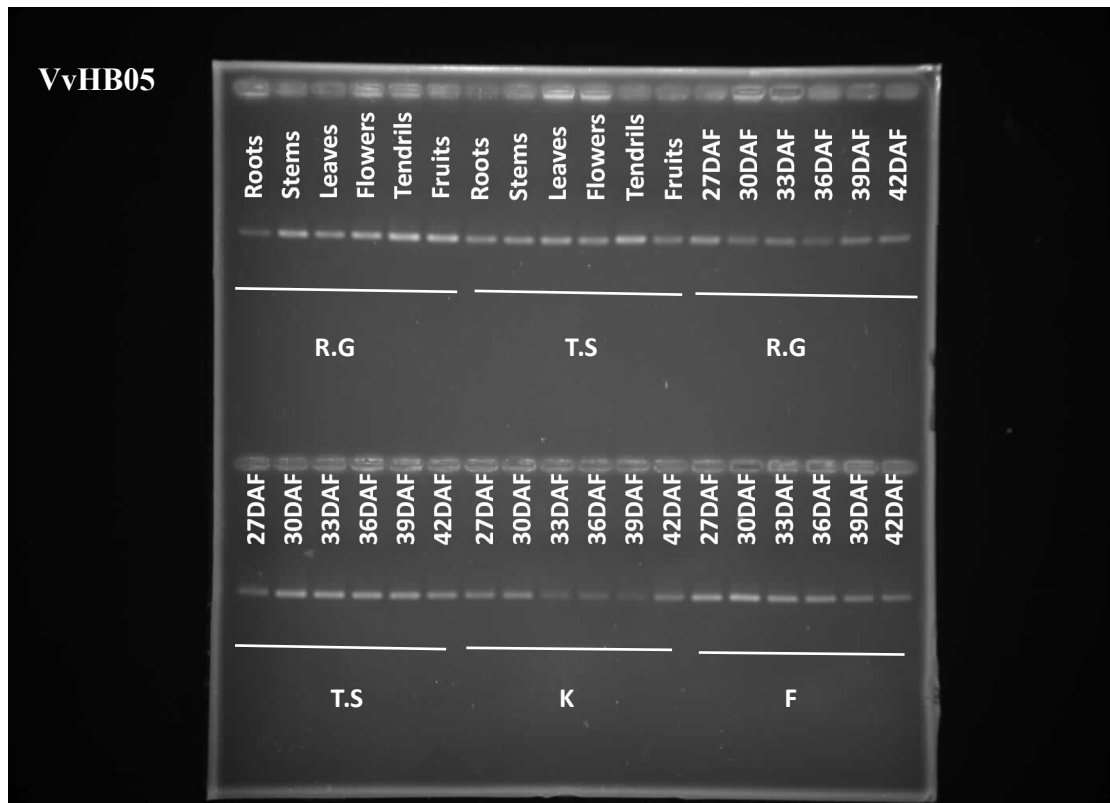

VvHB06

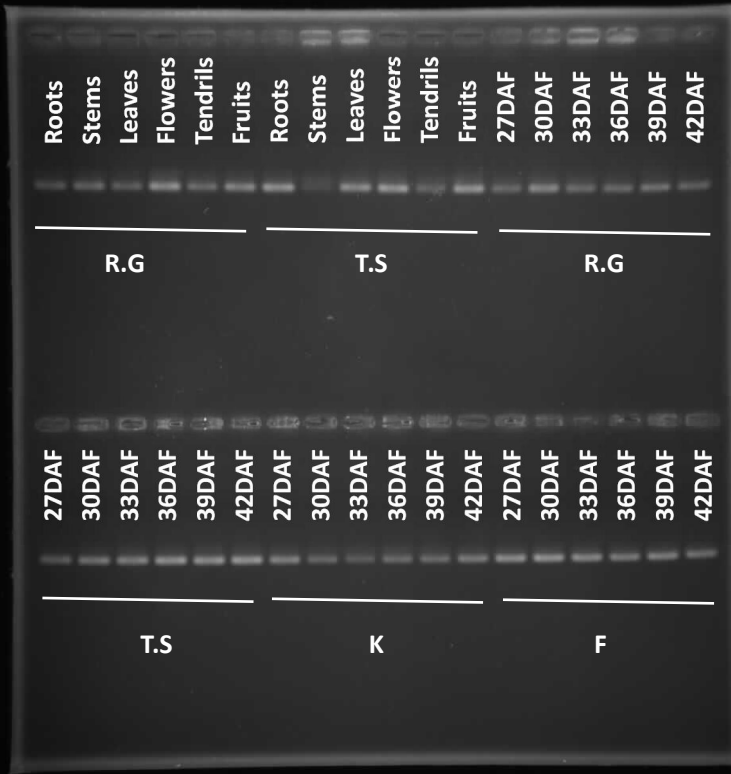

VvHB07

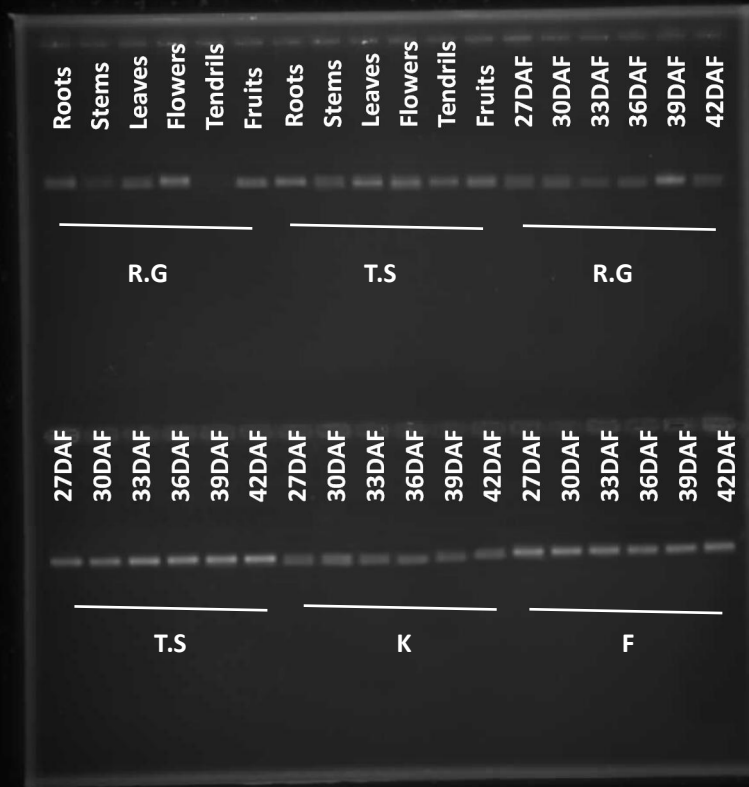



# VvHB15

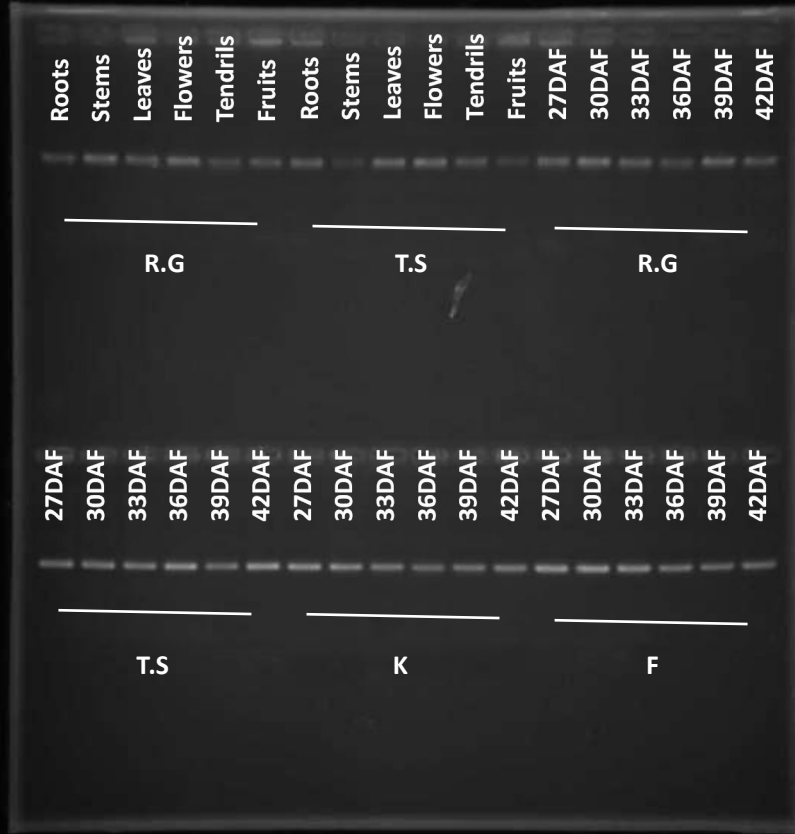

# VvHB16

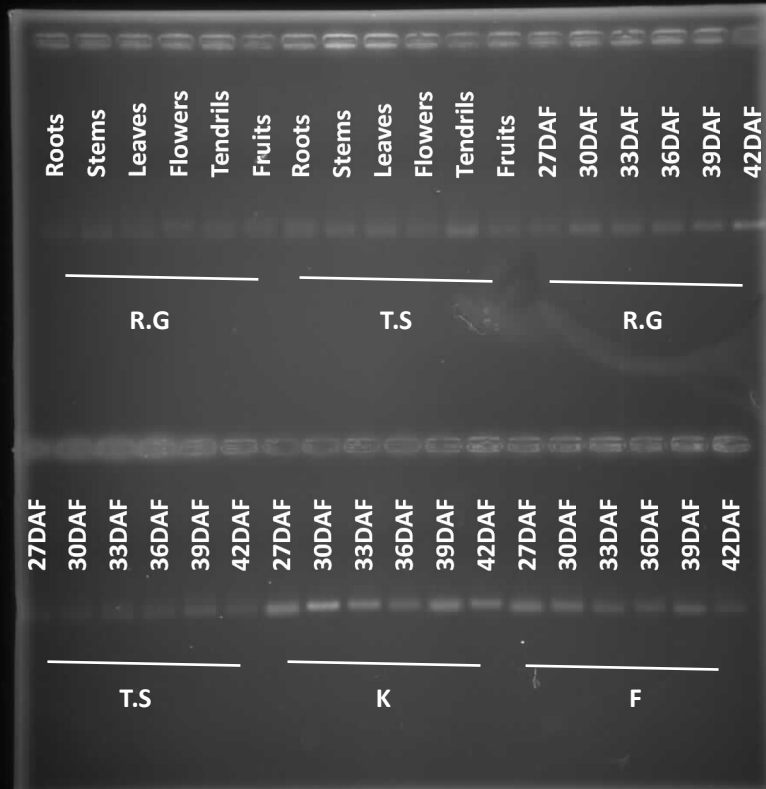

### VvHB17

|       |       |        |         |          |        |       |       |        |         |          |        |       |       |       |       |       |       |
|-------|-------|--------|---------|----------|--------|-------|-------|--------|---------|----------|--------|-------|-------|-------|-------|-------|-------|
| Roots | Stems | Leaves | Flowers | Tendrils | Fruits | Roots | Stems | Leaves | Flowers | Tendrils | Fruits | 27DAF | 30DAF | 33DAF | 36DAF | 39DAF | 42DAF |
| R.G   |       |        |         |          |        | T.S   |       |        |         |          |        | R.G   |       |       |       |       |       |
| 27DAF | 30DAF | 33DAF  | 36DAF   | 39DAF    | 42DAF  | 27DAF | 30DAF | 33DAF  | 36DAF   | 39DAF    | 42DAF  | 27DAF | 30DAF | 33DAF | 36DAF | 39DAF | 42DAF |
| F     |       |        |         |          |        | K     |       |        |         |          |        | T.S   |       |       |       |       |       |

### VvHB18

|       |       |        |         |          |        |       |       |        |         |          |        |       |       |       |       |       |       |
|-------|-------|--------|---------|----------|--------|-------|-------|--------|---------|----------|--------|-------|-------|-------|-------|-------|-------|
| Roots | Stems | Leaves | Flowers | Tendrils | Fruits | Roots | Stems | Leaves | Flowers | Tendrils | Fruits | 27DAF | 30DAF | 33DAF | 36DAF | 39DAF | 42DAF |
| R.G   |       |        |         |          |        | T.S   |       |        |         |          |        | R.G   |       |       |       |       |       |
| 27DAF | 30DAF | 33DAF  | 36DAF   | 39DAF    | 42DAF  | 27DAF | 30DAF | 33DAF  | 36DAF   | 39DAF    | 42DAF  | 27DAF | 30DAF | 33DAF | 36DAF | 39DAF | 42DAF |
| T.S   |       |        |         |          |        | K     |       |        |         |          |        | F     |       |       |       |       |       |

VvHB20

|          |          |          |
|----------|----------|----------|
| 27DAF    | 27DAF    | 27DAF    |
| 30DAF    | 30DAF    | 30DAF    |
| 33DAF    | 33DAF    | 33DAF    |
| 36DAF    | 36DAF    | 36DAF    |
| 39DAF    | 39DAF    | 39DAF    |
| 42DAF    | 42DAF    | 42DAF    |
| T.S      |          |          |
| 27DAF    | 27DAF    | 27DAF    |
| 30DAF    | 30DAF    | 30DAF    |
| 33DAF    | 33DAF    | 33DAF    |
| 36DAF    | 36DAF    | 36DAF    |
| 39DAF    | 39DAF    | 39DAF    |
| 42DAF    | 42DAF    | 42DAF    |
| K        |          |          |
| 27DAF    | 27DAF    | 27DAF    |
| 30DAF    | 30DAF    | 30DAF    |
| 33DAF    | 33DAF    | 33DAF    |
| 36DAF    | 36DAF    | 36DAF    |
| 39DAF    | 39DAF    | 39DAF    |
| 42DAF    | 42DAF    | 42DAF    |
| F        |          |          |
| R.G      |          |          |
| T.S      |          |          |
| R.G      |          |          |
| Roots    | Roots    | Roots    |
| Stems    | Stems    | Stems    |
| Leaves   | Leaves   | Leaves   |
| Flowers  | Flowers  | Flowers  |
| Tendrils | Tendrils | Tendrils |
| Fruits   | Fruits   | Fruits   |

VvHB21

|          |          |          |
|----------|----------|----------|
| 27DAF    | 27DAF    | 27DAF    |
| 30DAF    | 30DAF    | 30DAF    |
| 33DAF    | 33DAF    | 33DAF    |
| 36DAF    | 36DAF    | 36DAF    |
| 39DAF    | 39DAF    | 39DAF    |
| 42DAF    | 42DAF    | 42DAF    |
| T.S      |          |          |
| 27DAF    | 27DAF    | 27DAF    |
| 30DAF    | 30DAF    | 30DAF    |
| 33DAF    | 33DAF    | 33DAF    |
| 36DAF    | 36DAF    | 36DAF    |
| 39DAF    | 39DAF    | 39DAF    |
| 42DAF    | 42DAF    | 42DAF    |
| K        |          |          |
| 27DAF    | 27DAF    | 27DAF    |
| 30DAF    | 30DAF    | 30DAF    |
| 33DAF    | 33DAF    | 33DAF    |
| 36DAF    | 36DAF    | 36DAF    |
| 39DAF    | 39DAF    | 39DAF    |
| 42DAF    | 42DAF    | 42DAF    |
| F        |          |          |
| R.G      |          |          |
| T.S      |          |          |
| R.G      |          |          |
| Roots    | Roots    | Roots    |
| Stems    | Stems    | Stems    |
| Leaves   | Leaves   | Leaves   |
| Flowers  | Flowers  | Flowers  |
| Tendrils | Tendrils | Tendrils |
| Fruits   | Fruits   | Fruits   |

VvHB23

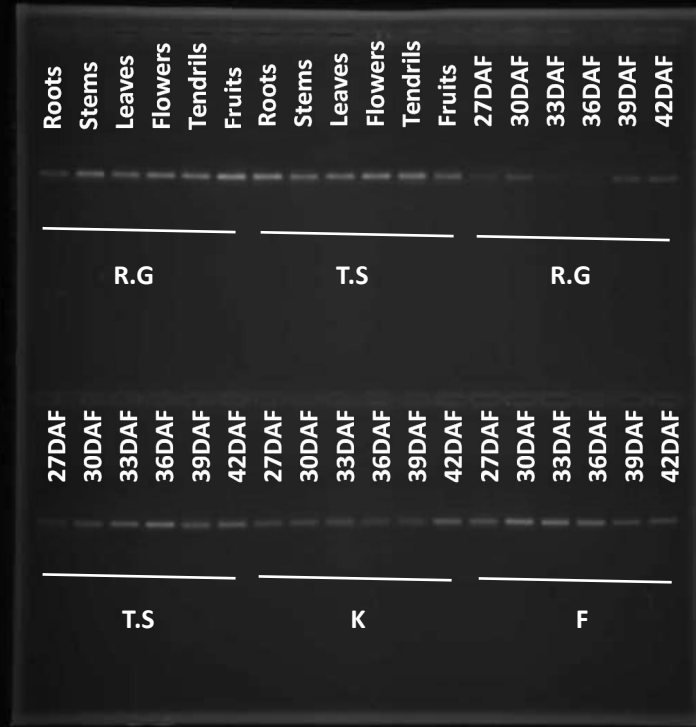

VvHB25

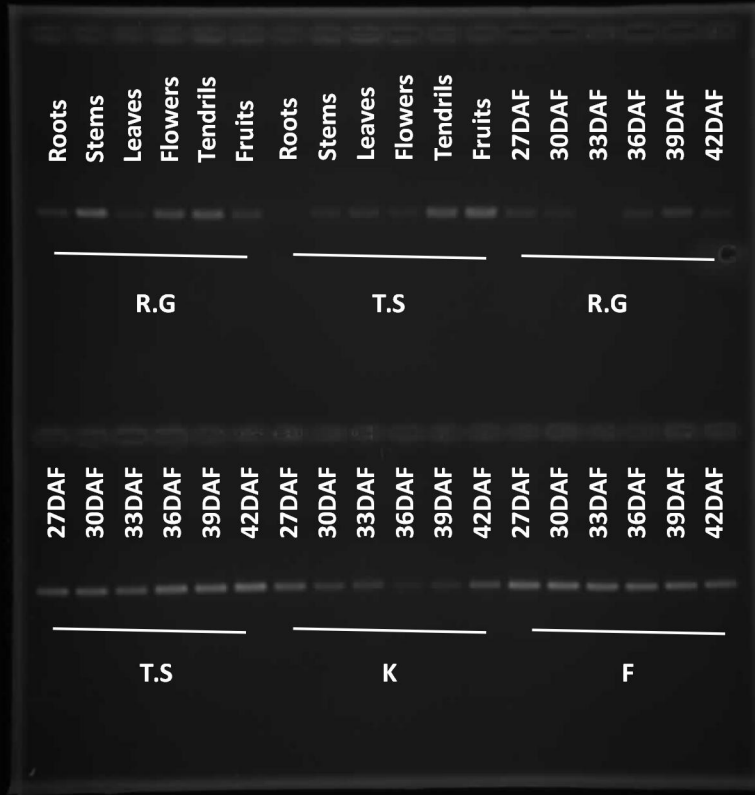

VvHB27

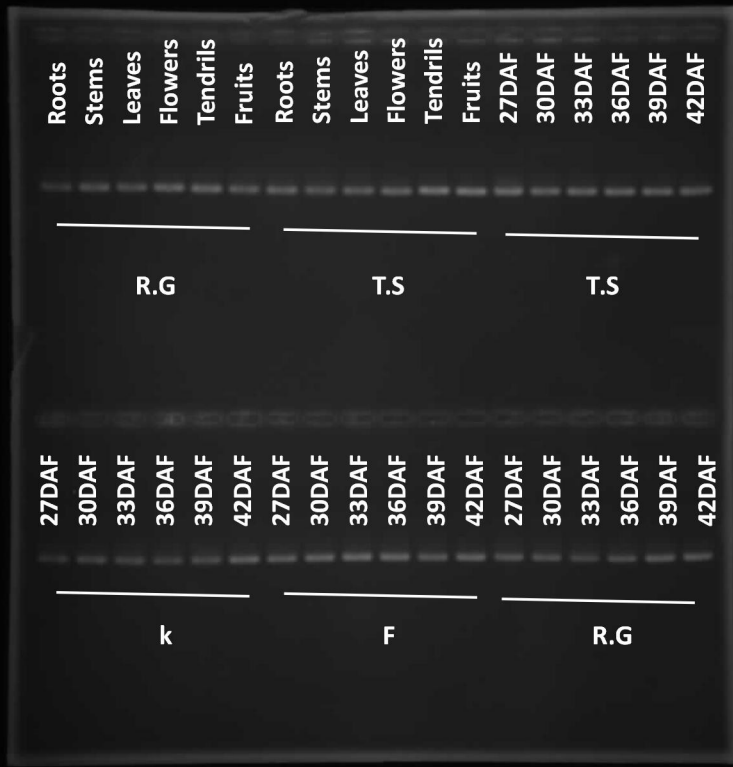

VvHB32

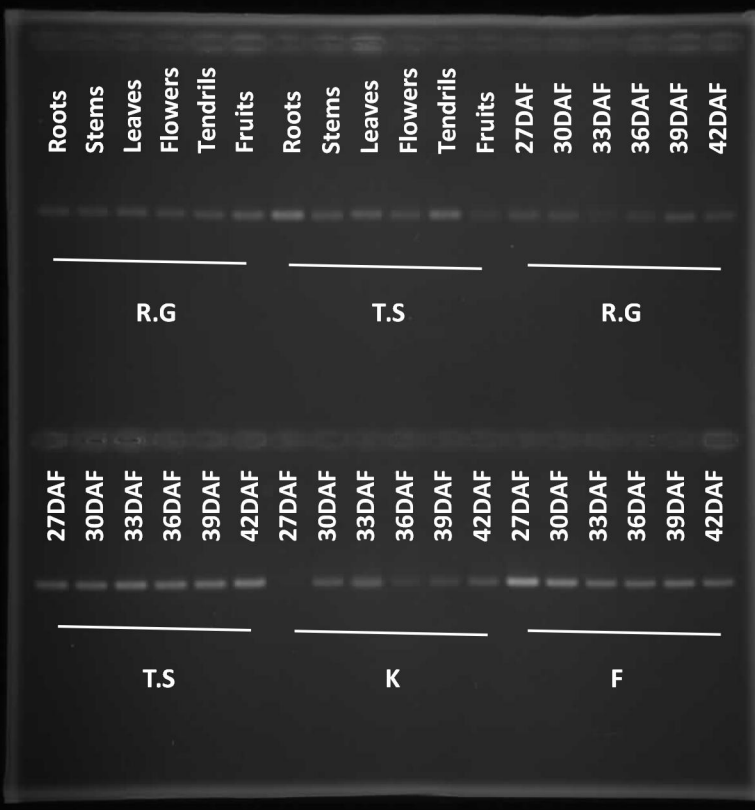

VvHB37

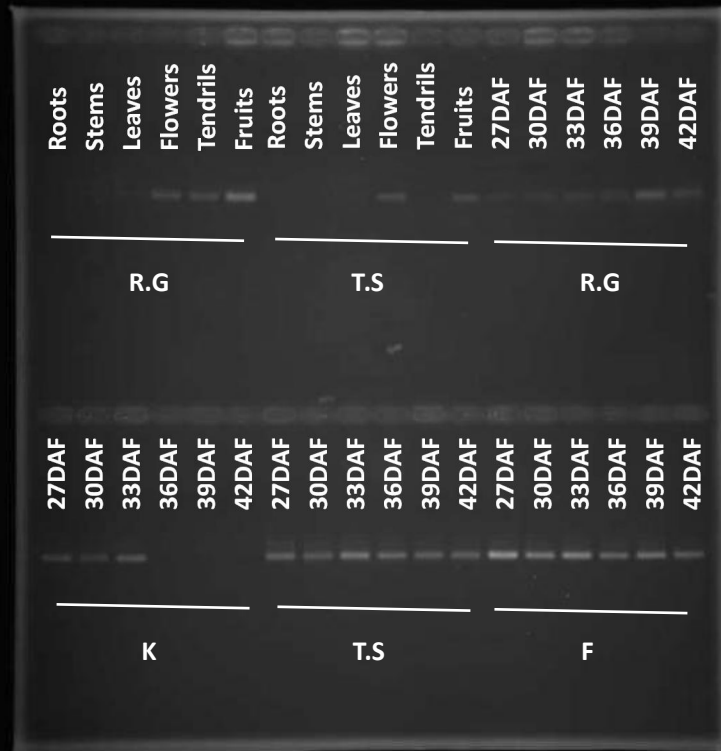

VvHB38

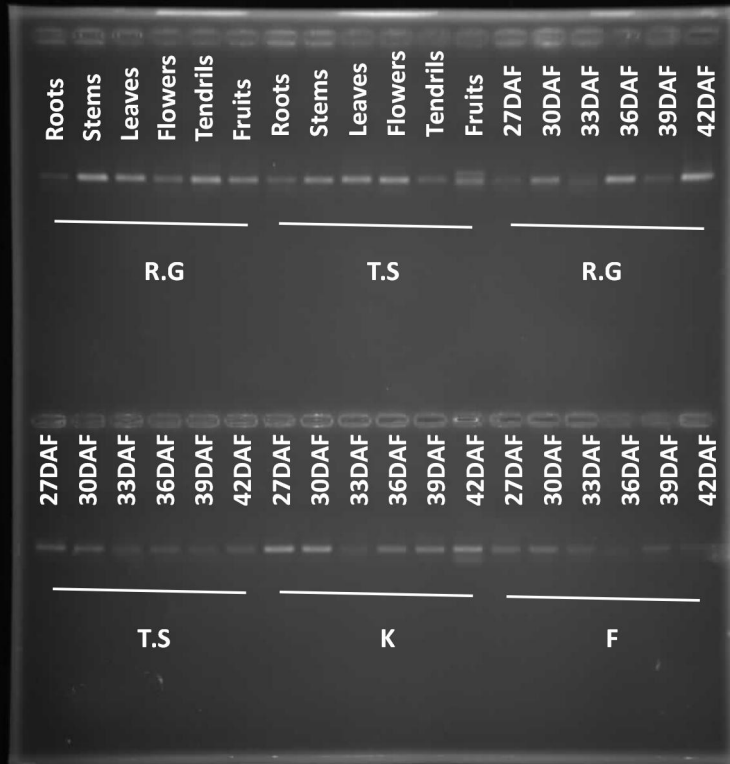



VvHB39

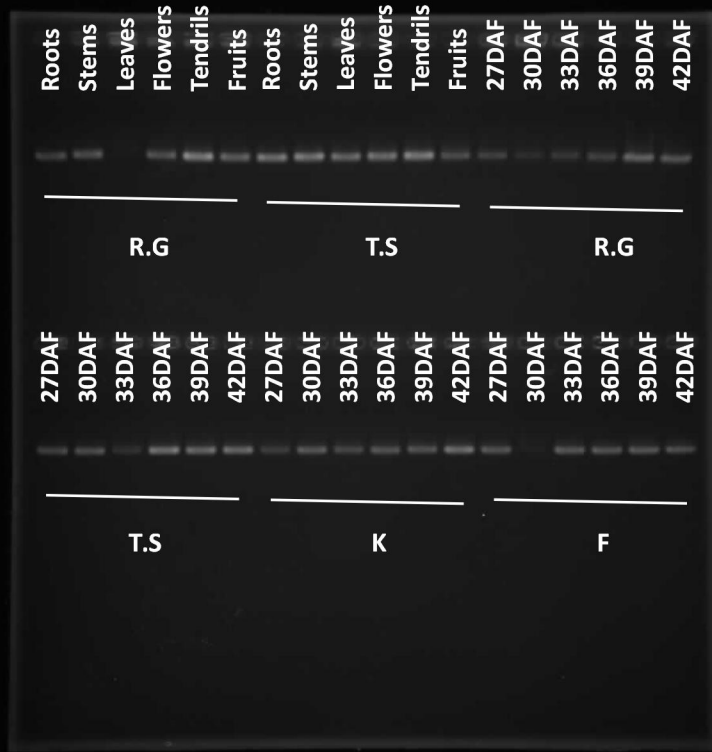

VvHB40

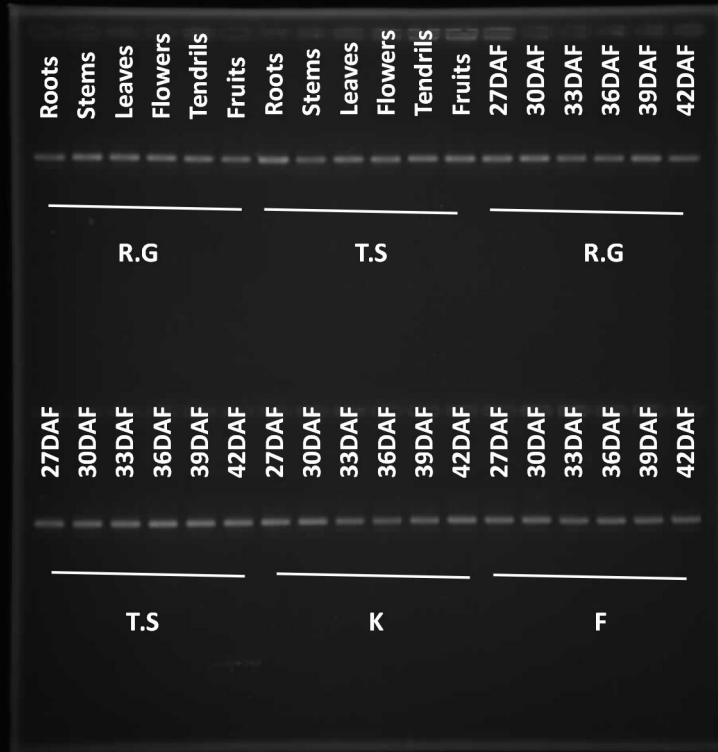

VvHB44

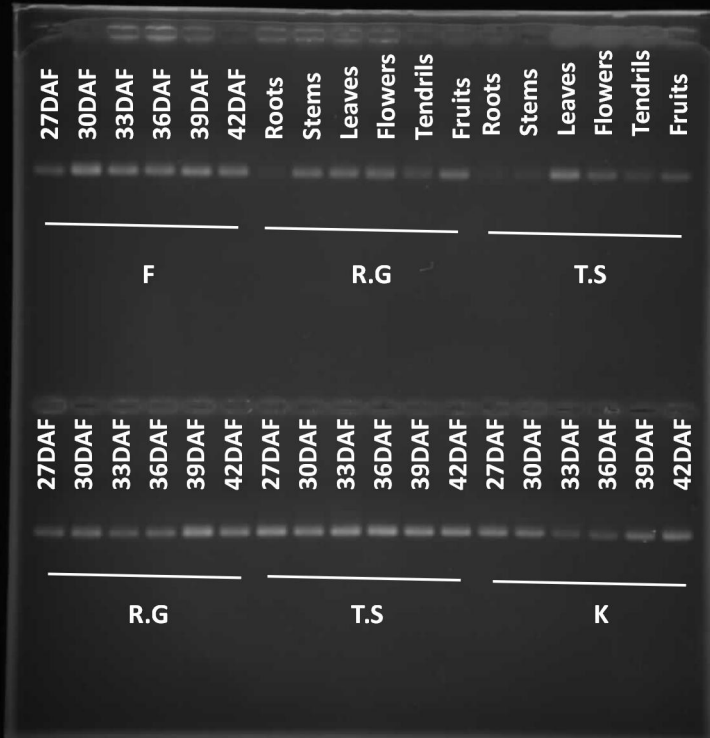

VvHB49

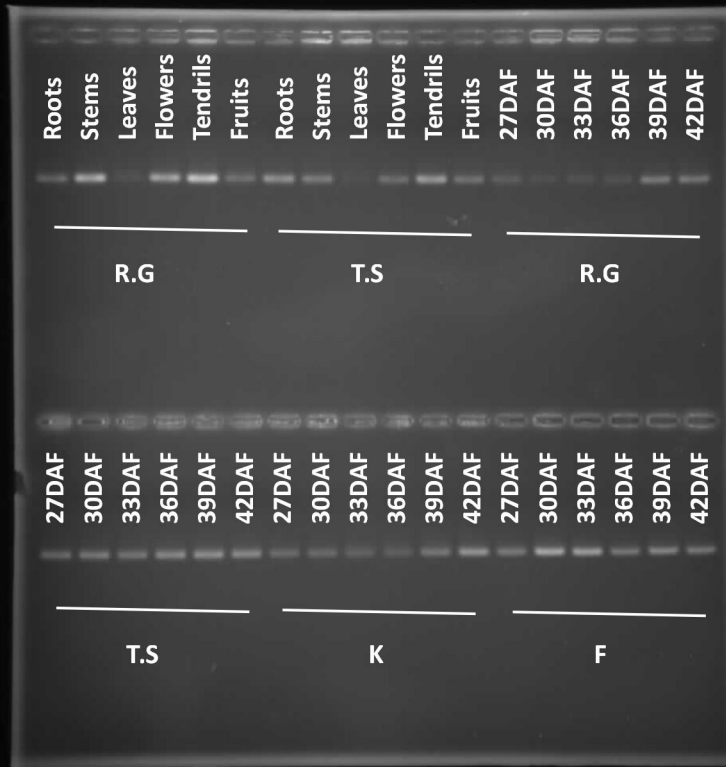

VvHB50

|          |          |          |
|----------|----------|----------|
| 27DAF    | 27DAF    | 27DAF    |
| 30DAF    | 30DAF    | 30DAF    |
| 33DAF    | 33DAF    | 33DAF    |
| 36DAF    | 36DAF    | 36DAF    |
| 39DAF    | 39DAF    | 39DAF    |
| 42DAF    | 42DAF    | 42DAF    |
| T.S      | K        | F        |
| R.G      | T.S      | R.G      |
| Roots    | Roots    | Roots    |
| Stems    | Stems    | Stems    |
| Leaves   | Leaves   | Leaves   |
| Flowers  | Flowers  | Flowers  |
| Tendrils | Tendrils | Tendrils |
| Fruits   | Fruits   | Fruits   |

VvHB52

|          |          |          |
|----------|----------|----------|
| 27DAF    | 27DAF    | 27DAF    |
| 30DAF    | 30DAF    | 30DAF    |
| 33DAF    | 33DAF    | 33DAF    |
| 36DAF    | 36DAF    | 36DAF    |
| 39DAF    | 39DAF    | 39DAF    |
| 42DAF    | 42DAF    | 42DAF    |
| T.S      | K        | F        |
| R.G      | T.S      | R.G      |
| Roots    | Roots    | Roots    |
| Stems    | Stems    | Stems    |
| Leaves   | Leaves   | Leaves   |
| Flowers  | Flowers  | Flowers  |
| Tendrils | Tendrils | Tendrils |
| Fruits   | Fruits   | Fruits   |

VvHB53

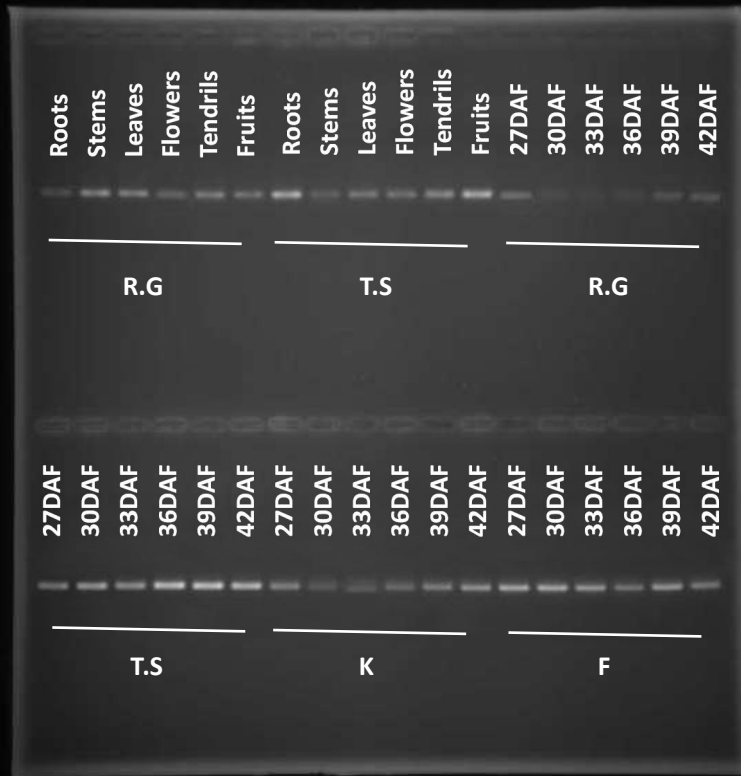

VvHB54

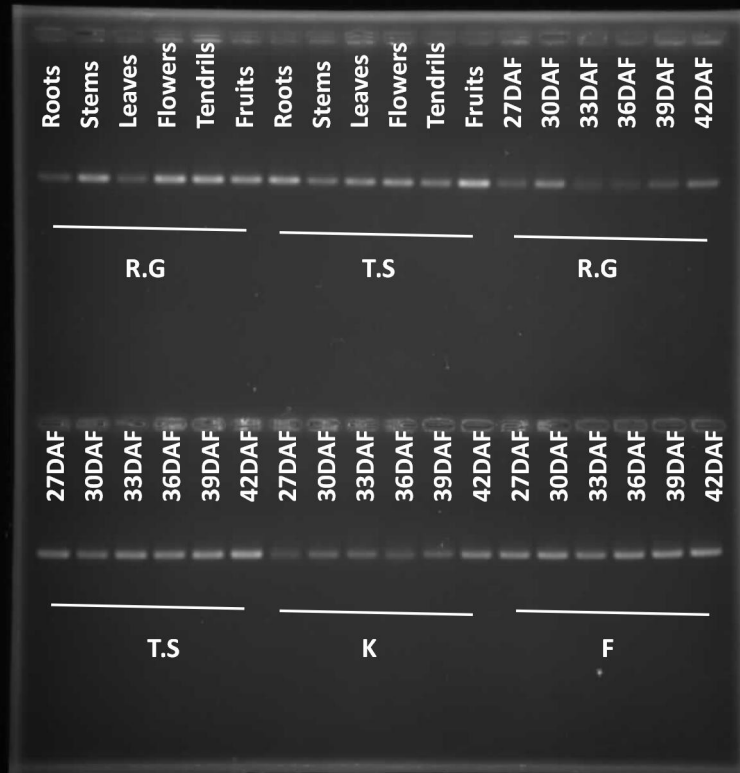

VvHB55

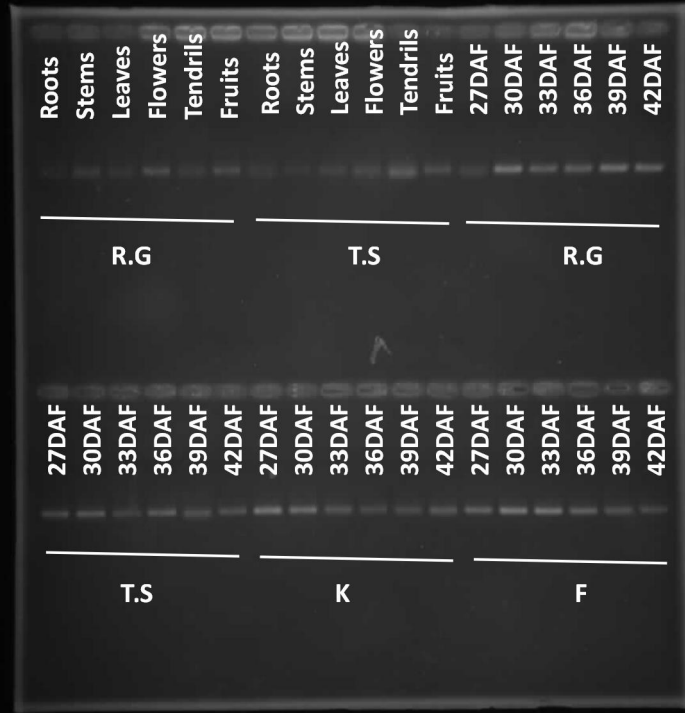

VvHB56

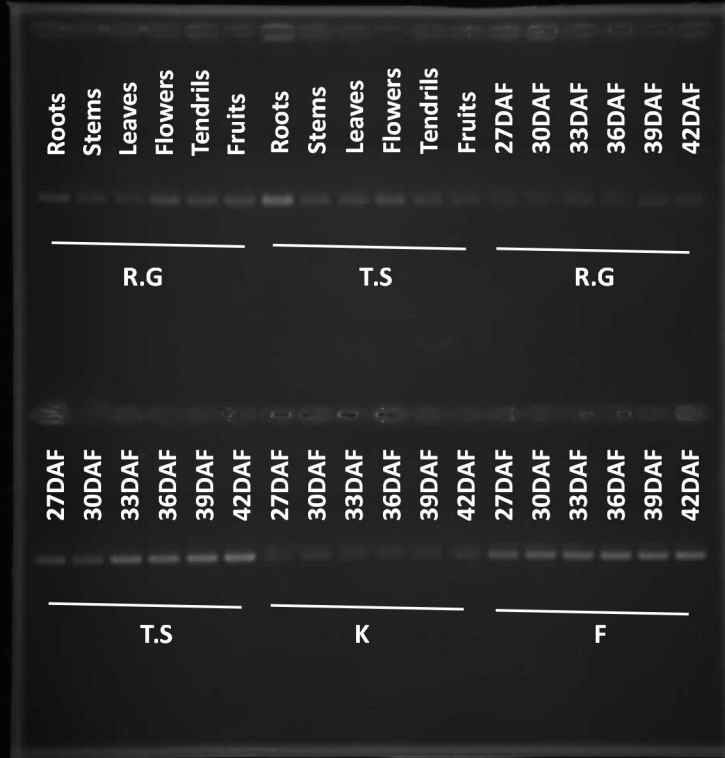

VvHB58

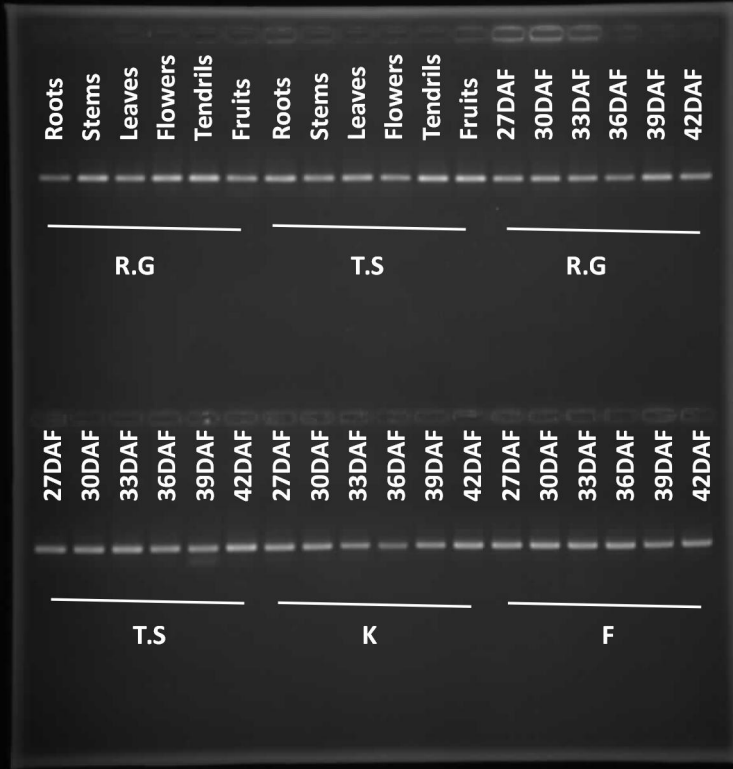

VvHB59

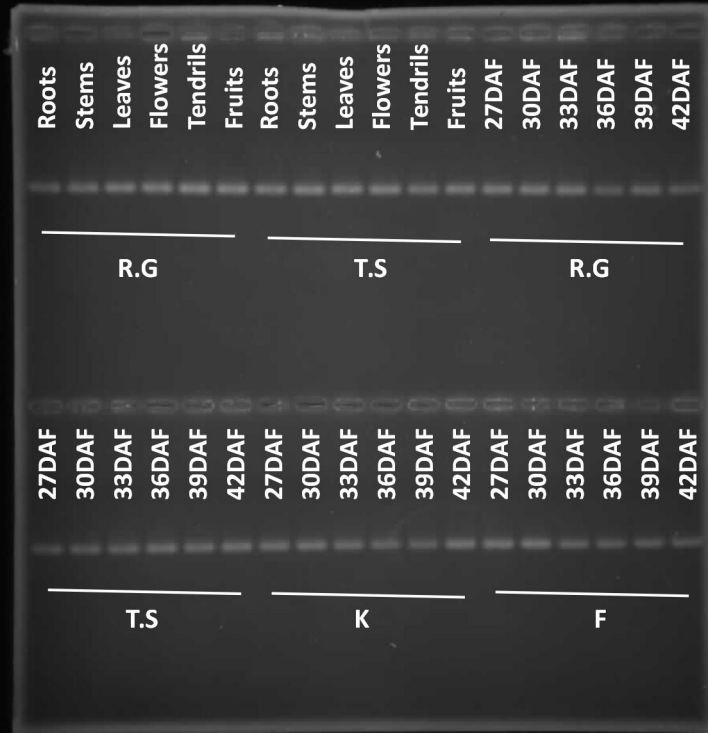



VvHB60

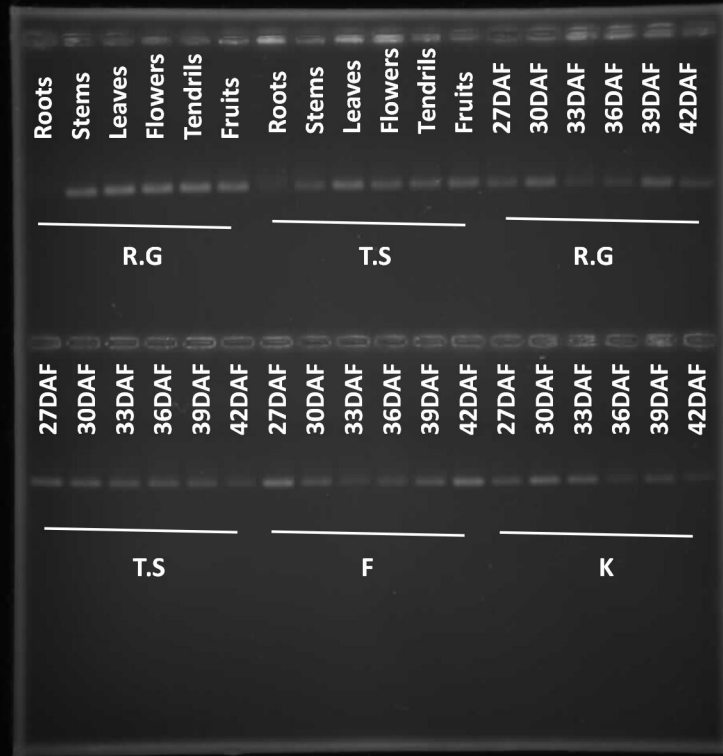

VvHB61

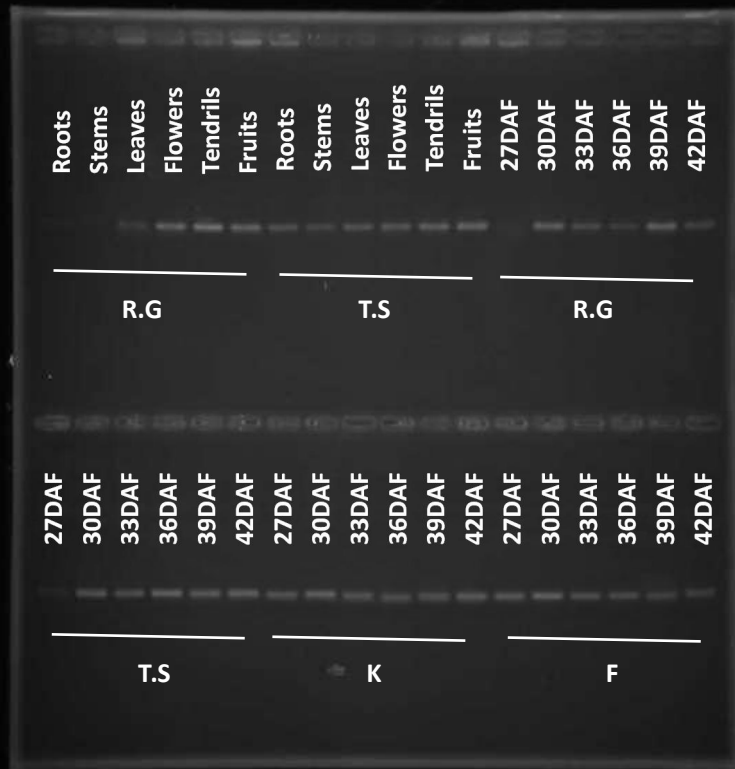

VvHB62

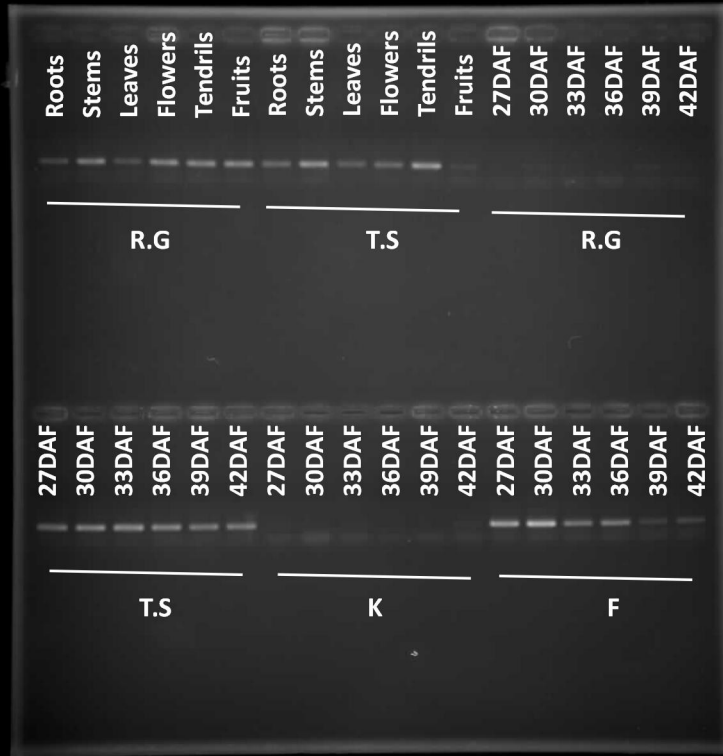

VvHB63

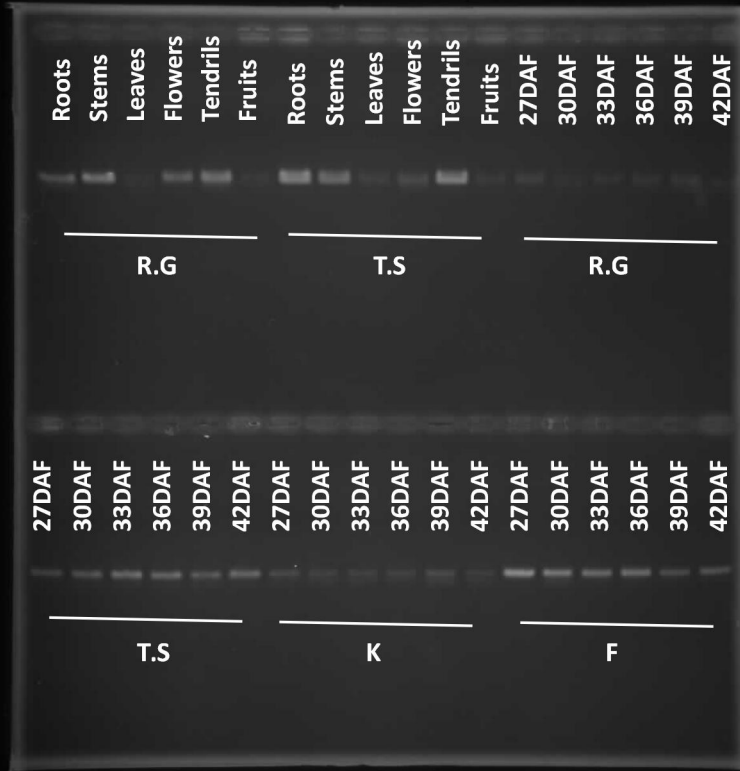



Supplementary Figure S6: Relative expression levels of *VvHB62*, *VvHB56* and *VvHB63* three genes in sarcocarp, fruits and ovules. Sarcocarp which was separated from fruits (at 42 days post anthesis) and ovules (42 days after full bloom) of ‘Thompson Seedless’ and ‘Red Globle’ were used as samples.

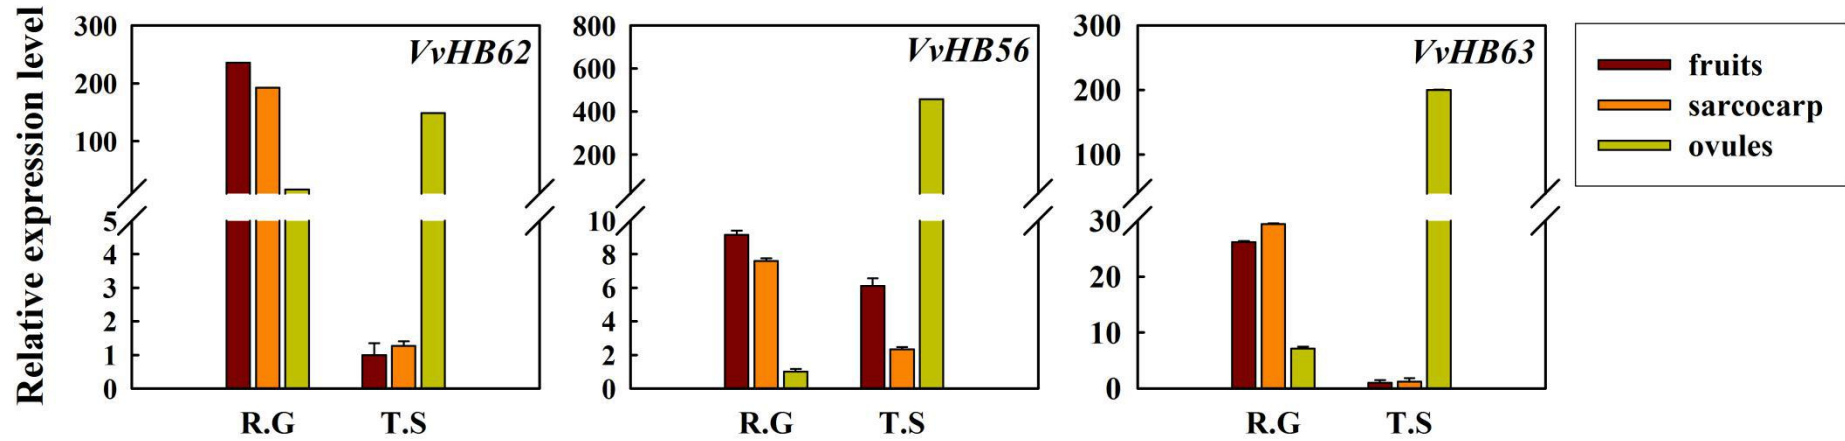

Supplementary Table S1: Number of homeobox genes subfamily members identified in *Arabidopsis* and *Vitis vinifera*. A comparison of subfamily representation between grape and *Arabidopsis* is given as ratio.

| <b>Subfamily</b> | <b><i>A.thaliana</i></b> | <b><i>V.vinifera</i></b> | <b>Ratio</b> |
|------------------|--------------------------|--------------------------|--------------|
| HD-ZIP I         | 17                       | 13                       | 0.76         |
| HD-ZIP II        | 10                       | 7                        | 0.7          |
| HD-ZIP III       | 5                        | 5                        | 1            |
| HD-ZIP IV        | 16                       | 8                        | 0.5          |
| PLINC            | 14                       | 0                        | 0            |
| WOX              | 16                       | 11                       | 0.69         |
| KNOX             | 8                        | 9                        | 1.13         |
| BEL              | 13                       | 12                       | 0.92         |
| DDT              | 4                        | 4                        | 1            |
| PHD              | 2                        | 2                        | 1            |
| NDX              | 1                        | 0                        | 0            |
| LD               | 1                        | 0                        | 0            |
| PINTOX           | 1                        | 1                        | 1            |
| SAWADEE          | 2                        | 1                        | 0.5          |
| Total            | 110                      | 73                       | 0.66         |

Supplementary Table S2: Conserved motifs of grape and *Arabidopsis* HB genes. (P value < 0.05)

| No. | Sequence of the motif                              | P value   | No. of VvHB/ATHB proteins in which motif is present |               |
|-----|----------------------------------------------------|-----------|-----------------------------------------------------|---------------|
|     |                                                    |           | VvHB proteins                                       | ATHB proteins |
| 1   | LEPKQVKNWFQNRREKKKQEE                              | 2.9E-1261 | 72                                                  | 109           |
| 2   | YHRHTPEQIZILERLFKECPH                              | 3.1E-461  | 51                                                  | 69            |
| 3   | ARRLPSGCLIQDCPNGYSKVTWVEHVEVE                      | 3.9E-464  | 13                                                  | 21            |
| 4   | PERAVSVLRAWLFEHFLHPYPKESDKIML                      | 4.4E-440  | 21                                                  | 21            |
| 5   | GGTLZLMYAZLQVPSPLVPTREFYFLRYCKQ                    | 5.9E-411  | 13                                                  | 21            |
| 6   | GEPPGIVLSAATSFWLPVPPQRVDFLRDERTRSZWDILSNGNPVQEMAH  | 3.9E-461  | 8                                                   | 16            |
| 7   | IAEETLAEFLSKATGTAVDWVQMPGMPGPD SIGIVAISHGCSGVAARAC | 1.7E-341  | 5                                                   | 5             |
| 8   | RYKQYYHQMQIVVSSFEQVAGLGAAPYALALQTISRHFRCCLKDAISGQ  | 1.3E-362  | 10                                                  | 12            |
| 9   | HELYRPLVNSGLAFGAKRWVATLQRQCER                      | 4.6E-284  | 8                                                   | 16            |
| 10  | GVLCAKASMLLQNVPPAILVRFLREHRSEWADYSVDAYSAA          | 7.1E-256  | 5                                                   | 5             |
| 11  | DGGDPDYIPJLPSGFRIIPDG                              | 6.5E-255  | 13                                                  | 21            |
| 12  | EASRESGVVIMNAINLVEIFMDVNWSELFP SIVSRAKTLEVJ        | 1.9E-346  | 8                                                   | 16            |
| 13  | SRLQTVNRKLTAMNKLLMEENDRLQKQVSQLVYENGYMRQQ          | 1.9E-249  | 5                                                   | 5             |
| 14  | KALCSEFPKIMQQGFACLPAGICLSSMGRPVSYEQAVAWKV          | 6.7E-231  | 5                                                   | 5             |
| 15  | PVFTFANQAGLDMLETTLVALQDITLDKI                      | 5.3E-182  | 5                                                   | 5             |
| 16  | VYGWGRQPAVLRAFSQR LSRGFNDVNGFTDDGW                 | 9.8E-181  | 5                                                   | 5             |
| 17  | QSLRIENARLKEELDRLSAJA                              | 7.1E-169  | 28                                                  | 43            |
| 18  | ESHPTAKLALMSVQTVN N LISSTVRVIKA                    | 7.9E-209  | 12                                                  | 18            |
| 19  | HENVALRAENDKLRAENIALREALKNAJCPNCGGPAVIGEM          | 1.3E-273  | 8                                                   | 14            |
| 20  | AWSVPEVLRPLYESSKVLAQKTTVAALRHJRQIAQETSGEV          | 2.4E-205  | 5                                                   | 5             |



| No. | Subfamilies in which motif is present in Grape/Arabidopsis |                                                                |
|-----|------------------------------------------------------------|----------------------------------------------------------------|
|     | in Grape                                                   | in Arabidopsis                                                 |
| 1   | HD-ZIP I-IV, WOX, SAWADEE, PHD, DDT, KNOX, BEL             | HD-ZIP I-IV, WOX, SAWADEE, PHD, DDT, KNOX, BEL, NDX, LD, PLINC |
| 2   | HD-ZIP I-IV, WOX, SAWADEE, PHD, DDT, PINTOX                | HD-ZIP I-IV, WOX, DDT, PINTOX,                                 |
| 3   | HD-ZIP III, HD-ZIP IV                                      | HD-ZIP III, HD-ZIP IV                                          |
| 4   | KNOX, BEL                                                  | KNOX, BEL                                                      |
| 5   | HD-ZIP III, HD-ZIP IV                                      | HD-ZIP III, HD-ZIP IV                                          |
| 6   | HD-ZIP IV                                                  | HD-ZIP IV                                                      |
| 7   | HD-ZIP III                                                 | HD-ZIP III                                                     |
| 8   | BEL                                                        | BEL                                                            |
| 9   | HD-ZIP IV                                                  | HD-ZIP IV                                                      |
| 10  | HD-ZIP III                                                 | HD-ZIP III                                                     |
| 11  | HD-ZIP III, HD-ZIP IV                                      | HD-ZIP III, HD-ZIP IV                                          |
| 12  | HD-ZIP IV                                                  | HD-ZIP IV                                                      |
| 13  | HD-ZIP III                                                 | HD-ZIP III                                                     |
| 14  | HD-ZIP III                                                 | HD-ZIP III                                                     |
| 15  | HD-ZIP III                                                 | HD-ZIP III                                                     |
| 16  | HD-ZIP III                                                 | HD-ZIP III                                                     |
| 17  | HD-ZIP I, HD-ZIP II, HD-ZIP IV                             | HD-ZIP I, HD-ZIP II, HD-ZIP IV                                 |
| 18  | HD-ZIP III, HD-ZIP IV                                      | HD-ZIP III, HD-ZIP IV                                          |
| 19  | HD-ZIP IV                                                  | HD-ZIP IV                                                      |
| 20  | HD-ZIP III                                                 | HD-ZIP III                                                     |

Supplementary Table S3: Tandem duplication events in the 73 *VvHB* genes

| Cluster number | Chromosome | Gene               | Start Site | End Site |
|----------------|------------|--------------------|------------|----------|
| 1              | chr1       | VvHB01 (HD-ZIP II) | 4488301    | 4491290  |
|                |            | VvHB02 (WOX)       | 4685930    | 4687708  |
| 2              | chr4       | VvHB20 (WOX)       | 20843708   | 20847365 |
|                |            | VvHB21 (WOX)       | 20861325   | 20865130 |
| 3              | chr10      | VvHB36 (DDT)       | 1562230    | 1582041  |
|                |            | VvHB37 (WOX)       | 1805314    | 1808227  |
| 4              | chr18      | VvHB63 (KNOX)      | 6870320    | 6876771  |
|                |            | VvHB64 (HD-ZIP II) | 6881993    | 6883411  |
| 5              | chr18      | VvHB67 (BEL)       | 11196526   | 11198339 |
|                |            | VvHB68 (BEL)       | 11201410   | 11205044 |
| 6              | chr19      | VvHB69 (SAWADEE)   | 2065687    | 2074580  |
|                |            | VvHB70 (HD-ZIP I)  | 2259485    | 2272052  |

Supplementary Table S4: Synteny blocks of *VvHB* genes within grape genomes

| ID* | region1( <i>Grape</i> ) |          |          | region2( <i>Grape</i> ) |          |          | Gene in the synteny region |                   | Gene name              |                        |
|-----|-------------------------|----------|----------|-------------------------|----------|----------|----------------------------|-------------------|------------------------|------------------------|
|     | Chr                     | Start    | Stop     | Chr                     | Start    | Stop     | Gene 1                     | Gene 2            | Gene 1                 | Gene 2                 |
| 30  | chr13                   | 23812858 | 24096128 | chr8                    | 20724328 | 19994166 | GSVIVG01001366001          | GSVIVG01033481001 | VvHB48<br>(HD-ZIP II)  | VvHB32<br>(HD-ZIP II)  |
| 49  | chr17                   | 8454312  | 10330607 | chr1                    | 10011362 | 7333255  | GSVIVG01007715001          | GSVIVG01013790001 | VvHB59<br>(KNOX )      | VvHB3<br>(KNOX )       |
| 45  | chr17                   | 5814755  | 7784744  | chr1                    | 10067645 | 15346615 | GSVIVG01008065001          | GSVIVG01020078001 | VvHB58<br>(HD-ZIP I)   | VvHB4<br>(HD-ZIP I)    |
| 48  | chr17                   | 1666197  | 4710077  | chr1                    | 5375923  | 2251732  | GSVIVG01008424001          | GSVIVG01011738001 | VvHB57<br>(WOX)        | VvHB2<br>(WOX)         |
| 67  | chr18                   | 10068356 | 12810091 | chr4                    | 17429918 | 20390368 | GSVIVG01009633001          | GSVIVG01019043001 | VvHB66<br>(BEL)        | VvHB17<br>(BEL)        |
| 58  | chr18                   | 11196526 | 12904974 | chr3                    | 40975    | 1730564  | GSVIVG01009779001          | GSVIVG01024224001 | VvHB67<br>(BEL)        | VvHB10<br>(BEL)        |
| 41  | chr16                   | 13450982 | 16162952 | chr15                   | 14506625 | 16138896 | GSVIVG01010600001          | GSVIVG01027508001 | VvHB55<br>(HD-ZIP IV)  | VvHB53<br>(HD-ZIP IV)  |
| 32  | chr14                   | 28844329 | 29813645 | chr1                    | 10815152 | 13910631 | GSVIVG01011377001          | GSVIVG01020033001 | VvHB51<br>(HD-ZIP I)   | VvHB5<br>(HD-ZIP I)    |
| 13  | chr11                   | 5869916  | 7689143  | chr4                    | 6447365  | 5372703  | GSVIVG01012897001          | GSVIVT01035921001 | VvHB40<br>(KNOX )      | VvHB15<br>(KNOX )      |
| 25  | chr13                   | 4546379  | 6087112  | chr6                    | 4760340  | 2948720  | GSVIVT01016272001          | GSVIVT01025193001 | VvHB47<br>(HD-ZIP III) | VvHB23<br>(HD-ZIP III) |
| 126 | chr9                    | 3404650  | 7445837  | chr4                    | 2669216  | 5171733  | GSVIVT01017010001          | GSVIVT01035612001 | VvHB33<br>(HD-ZIP III) | VvHB13<br>(HD-ZIP III) |
| 81  | chr2                    | 236398   | 2725052  | chr15                   | 19083025 | 16064252 | GSVIVT01019655001          | GSVIVT01027407001 | VvHB7<br>(HD-ZIP I)    | VvHB54<br>(HD-ZIP I)   |
| 86  | chr2                    | 1560083  | 2576046  | chr16                   | 21974662 | 21111941 | GSVIVT01019655001          | GSVIVT01038619001 | VvHB7<br>(HD-ZIP I)    | VvHB56<br>(HD-ZIP I)   |
| 18  | chr12                   | 1992495  | 4110237  | chr10                   | 3493620  | 1346397  | GSVIVT01020605001          | GSVIVT01021113001 | VvHB42<br>(DDT)        | VvHB36<br>(DDT)        |
| 38  | chr15                   | 16447701 | 17409766 | chr16                   | 21102338 | 21974662 | GSVIVT01027407001          | GSVIVT01038619001 | VvHB54<br>(HD-ZIP I)   | VvHB56<br>(HD-ZIP I)   |

\* ID means the synteny block ID in the synteny analysis (Nucleic Acids Res, 2012. 40(7): e49.)

Supplementary Table S5: Synteny blocks of homeobox genes between grape and *Arabidopsis*

| ID* | region1 ( <i>Arabidopsis</i> ) |          |          | region2 ( <i>Grape</i> ) |          |          | Gene in the synteny region |                    |
|-----|--------------------------------|----------|----------|--------------------------|----------|----------|----------------------------|--------------------|
|     | Chr                            | Start    | Stop     | Chr                      | Start    | Stop     | Gene 1                     | Gene 2             |
| 53  | Chr1                           | 1502344  | 1542432  | chr12                    | 7051966  | 7470668  | AT1G05230 (HD-ZIP IV)      | VvHB44 (HD-ZIP IV) |
| 122 | Chr1                           | 6998489  | 7382462  | chr18                    | 1780353  | 70305    | AT1G20700 (WOX)            | VvHB61 (WOX)       |
| 105 | Chr1                           | 8260865  | 8569996  | chr17                    | 10814954 | 8528864  | AT1G23380 (KNOX )          | VvHB59 (KNOX )     |
| 0   | Chr1                           | 8295185  | 8404301  | chr1                     | 7494007  | 8210725  | AT1G23380 (KNOX )          | VvHB3 (KNOX )      |
| 76  | Chr1                           | 9182204  | 9465444  | chr14                    | 30137019 | 28545588 | AT1G26960 (HD-ZIP I)       | VvHB51 (HD-ZIP I)  |
| 32  | Chr1                           | 9295736  | 9361833  | chr1                     | 11687175 | 11234424 | AT1G26960 (HD-ZIP I)       | VvHB5 (HD-ZIP I)   |
| 60  | Chr1                           | 9931934  | 10231142 | chr12                    | 4105274  | 2352608  | AT1G28420 (DDT)            | VvHB42 (DDT)       |
| 40  | Chr1                           | 9911898  | 10266818 | chr10                    | 1335630  | 3199699  | AT1G28420 (DDT)            | VvHB36 (DDT)       |
| 52  | Chr1                           | 22932901 | 23104647 | chr12                    | 5491822  | 6546456  | AT1G62360 (KNOX )          | VvHB43 (KNOX )     |
| 160 | Chr1                           | 23331676 | 23469204 | chr2                     | 4250807  | 3480175  | AT1G62990 (KNOX )          | VvHB8 (KNOX )      |
| 74  | Chr1                           | 26063816 | 26626503 | chr14                    | 30011357 | 27051487 | AT1G69780 (HD-ZIP I)       | VvHB51 (HD-ZIP I)  |
| 92  | Chr1                           | 26363278 | 26621659 | chr17                    | 8454312  | 10707300 | AT1G70510 (KNOX )          | VvHB59 (KNOX )     |
| 30  | Chr1                           | 26561824 | 26600219 | chr1                     | 7875921  | 7333255  | AT1G70510 (KNOX )          | VvHB3 (KNOX )      |
| 16  | Chr1                           | 26735956 | 26828674 | chr1                     | 4491290  | 4016641  | AT1G70920 (HD-ZIP II)      | VvHB1 (HD-ZIP II)  |
| 206 | Chr2                           | 163954   | 237147   | chr1                     | 4359602  | 4748971  | AT2G01430 (HD-ZIP II)      | VvHB1 (HD-ZIP II)  |
| 259 | Chr2                           | 88847    | 243493   | chr17                    | 2869660  | 1966513  | AT2G01500 (WOX)            | VvHB57 (WOX)       |
| 284 | Chr2                           | 7634274  | 7990586  | chr4                     | 20841170 | 18395062 | AT2G17950 (WOX)            | VvHB19 (WOX)       |
| 307 | Chr2                           | 9504659  | 9975192  | chr7                     | 14791101 | 16682195 | AT2G22430 (HD-ZIP I)       | VvHB27 (HD-ZIP I)  |
| 260 | Chr2                           | 9513219  | 9946269  | chr18                    | 5092140  | 8531571  | AT2G22800 (HD-ZIP II)      | VvHB64 (HD-ZIP II) |
| 262 | Chr2                           | 9904787  | 10132779 | chr18                    | 9477475  | 10230335 | AT2G23760 (BEL)            | VvHB66 (BEL)       |
| 283 | Chr2                           | 10097559 | 10132779 | chr4                     | 17398366 | 17614321 | AT2G23760 (BEL)            | VvHB17 (BEL)       |
| 297 | Chr2                           | 11921433 | 13011063 | chr6                     | 3098092  | 9133237  | AT2G27990 (BEL)            | VvHB22 (BEL)       |
| 236 | Chr2                           | 13713036 | 13747791 | chr12                    | 7470668  | 7078502  | AT2G32370 (HD-ZIP IV)      | VvHB44 (HD-ZIP IV) |

| ID* | region1(Arabidopsis) |          |          | region2(Grape) |          |          | Gene in the syteny region |                    |
|-----|----------------------|----------|----------|----------------|----------|----------|---------------------------|--------------------|
|     | Chr                  | Start    | Stop     | Chr            | Start    | Stop     | Gene 1                    | Gene 2             |
| 214 | Chr2                 | 14300772 | 14515915 | chr10          | 1304688  | 3273334  | AT2G33880 (WOX)           | VvHB37 (WOX)       |
| 317 | Chr2                 | 15106940 | 15511514 | chr8           | 16424080 | 18999734 | AT2G36610 (HD-ZIP I)      | VvHB31 (HD-ZIP I)  |
| 252 | Chr2                 | 18379564 | 18853709 | chr15          | 9935686  | 16207483 | AT2G44910 (HD-ZIP II)     | VvHB52 (HD-ZIP II) |
| 271 | Chr2                 | 19153328 | 19262404 | chr2           | 2231721  | 2551460  | AT2G46680 (HD-ZIP I)      | VvHB7 (HD-ZIP I)   |
| 253 | Chr2                 | 18855775 | 19277773 | chr15          | 20079735 | 16362838 | AT2G46680 (HD-ZIP I)      | VvHB54 (HD-ZIP I)  |
| 256 | Chr2                 | 19086561 | 19235087 | chr16          | 21974662 | 21228111 | AT2G46680 (HD-ZIP I)      | VvHB56 (HD-ZIP I)  |
| 375 | Chr3                 | 1653     | 350010   | chr14          | 30170199 | 25221541 | AT3G01220 (HD-ZIP I)      | VvHB51 (HD-ZIP I)  |
| 361 | Chr3                 | 3521357  | 3597952  | chr13          | 5231188  | 3298345  | AT3G11260 (WOX)           | VvHB46 (WOX)       |
| 394 | Chr3                 | 6094098  | 6403348  | chr17          | 1518274  | 4537653  | AT3G18010 (WOX)           | VvHB57 (WOX)       |
| 385 | Chr3                 | 22222105 | 22625716 | chr15          | 9984817  | 15448056 | AT3G60390 (HD-ZIP II)     | VvHB52 (HD-ZIP II) |
| 386 | Chr3                 | 22585655 | 22658390 | chr15          | 15541545 | 16213665 | AT3G61150 (HD-ZIP IV)     | VvHB53 (HD-ZIP IV) |
| 387 | Chr3                 | 22662960 | 22958995 | chr15          | 20114200 | 16407196 | AT3G61890 (HD-ZIP I)      | VvHB54 (HD-ZIP I)  |
| 536 | Chr4                 | 9354321  | 9604207  | chr15          | 13756927 | 10988829 | AT4G16780 (HD-ZIP II)     | VvHB52 (HD-ZIP II) |
| 538 | Chr4                 | 9714092  | 9833006  | chr15          | 13469630 | 10890572 | AT4G17460 (HD-ZIP II)     | VvHB52 (HD-ZIP II) |
| 503 | Chr4                 | 11548618 | 11776039 | chr10          | 260075   | 1213743  | AT4G21750 (HD-ZIP IV)     | VvHB35 (HD-ZIP IV) |
| 540 | Chr4                 | 12901534 | 13108827 | chr16          | 9082240  | 18062107 | AT4G25530 (HD-ZIP IV)     | VvHB55 (HD-ZIP IV) |
| 517 | Chr4                 | 14601621 | 14737978 | chr11          | 18015419 | 15969015 | AT4G29940 (PHD)           | VvHB41 (PHD)       |
| 519 | Chr4                 | 15419404 | 15525448 | chr11          | 7689143  | 5932036  | AT4G32040 (KNOX )         | VvHB40 (KNOX )     |
| 588 | Chr4                 | 15383201 | 15500847 | chr4           | 5247592  | 5930252  | AT4G32040 (KNOX )         | VvHB15 (KNOX )     |
| 589 | Chr4                 | 15831576 | 15926628 | chr4           | 480827   | 846927   | AT4G32980 (BEL)           | VvHB12 (BEL)       |
| 594 | Chr4                 | 16865488 | 17279201 | chr4           | 20881776 | 18296443 | AT4G35550 (WOX)           | VvHB20 (WOX)       |
| 597 | Chr4                 | 17298200 | 17373930 | chr4           | 17886811 | 17429918 | AT4G36740 (HD-ZIP I)      | VvHB18 (HD-ZIP I)  |
| 552 | Chr4                 | 17093088 | 17541799 | chr18          | 11980862 | 9477475  | AT4G36870 (BEL)           | VvHB66 (BEL)       |
| 554 | Chr4                 | 17540490 | 17874804 | chr18          | 8237760  | 5846804  | AT4G37790 (HD-ZIP II)     | VvHB64 (HD-ZIP II) |

| ID* | region1(Arabidopsis) |          |          | region2(Grape) |          |          | Gene in the synteny region |                    |
|-----|----------------------|----------|----------|----------------|----------|----------|----------------------------|--------------------|
|     | Chr                  | Start    | Stop     | Chr            | Start    | Stop     | Gene 1                     | Gene 2             |
| 549 | Chr4                 | 18384100 | 18584524 | chr18          | 3963411  | 5336005  | AT4G40060 (HD-ZIP I)       | VvHB62 (HD-ZIP I)  |
| 790 | Chr5                 | 383153   | 659733   | chr8           | 15471385 | 14139513 | AT5G02030 (BEL)            | VvHB30 (BEL)       |
| 788 | Chr5                 | 908563   | 1015345  | chr8           | 17614517 | 18269207 | AT5G03790 (HD-ZIP I)       | VvHB31 (HD-ZIP I)  |
| 657 | Chr5                 | 1734487  | 1836722  | chr13          | 4547834  | 3298345  | AT5G05770 (WOX)            | VvHB46 (WOX)       |
| 792 | Chr5                 | 2029897  | 2129324  | chr8           | 20735141 | 19953117 | AT5G06710 (HD-ZIP II)      | VvHB32 (HD-ZIP II) |
| 735 | Chr5                 | 3459273  | 3519449  | chr4           | 5372703  | 6059248  | AT5G11060 (KNOX )          | VvHB15 (KNOX )     |
| 740 | Chr5                 | 3459273  | 3747125  | chr4           | 5390746  | 2657661  | AT5G11270 (PINTOX)         | VvHB14 (PINTOX)    |
| 663 | Chr5                 | 4477354  | 5057411  | chr14          | 24525304 | 30253071 | AT5G15150 (HD-ZIP I)       | VvHB51 (HD-ZIP I)  |
| 644 | Chr5                 | 17763681 | 17843751 | chr12          | 3753289  | 4425457  | AT5G44180 (DDT)            | VvHB42 (DDT)       |
| 626 | Chr5                 | 18507489 | 18700656 | chr10          | 3919935  | 1588546  | AT5G45980 (WOX)            | VvHB37 (WOX)       |
| 681 | Chr5                 | 19090298 | 19217909 | chr15          | 10798618 | 12593884 | AT5G47370 (HD-ZIP II)      | VvHB52 (HD-ZIP II) |
| 685 | Chr5                 | 20797017 | 21643562 | chr16          | 8000259  | 19401729 | AT5G52170 (HD-ZIP IV)      | VvHB55 (HD-ZIP IV) |
| 683 | Chr5                 | 20913553 | 21199959 | chr15          | 14614856 | 16138896 | AT5G52170 (HD-ZIP IV)      | VvHB53 (HD-ZIP IV) |
| 724 | Chr5                 | 21725441 | 21948913 | chr19          | 3310746  | 1981264  | AT5G53980 (HD-ZIP I)       | VvHB70 (HD-ZIP I)  |
| 772 | Chr5                 | 26083328 | 26275919 | chr7           | 14787888 | 15197600 | AT5G65310 (HD-ZIP I)       | VvHB27 (HD-ZIP I)  |
| 715 | Chr5                 | 25977621 | 26365998 | chr18          | 4121977  | 7292423  | AT5G65310 (HD-ZIP I)       | VvHB62 (HD-ZIP I)  |
| 736 | Chr5                 | 26584780 | 26644402 | chr4           | 17449433 | 17936828 | AT5G66700 (HD-ZIP I)       | VvHB18 (HD-ZIP I)  |

\* ID refers to the synteny block ID in the synteny analysis (Nucleic Acids Res, 2012. 40(7): e49.)

Supplementary Table S6: Transcriptome analysis result of 33 grape HB genes at three ovules/seeds developmental stages. “Ratio” refers to the ratio of the gene expression levels in the seedless grape varieties to the gene expression levels in the seeded grape varieties. P-value less than 0.05 indicates significantly changed pathways and all the genes are significant differentially expressed genes at least at one developmental stage.

| Gene ID       | Gene locus ID     | Stages of ovule development |             |             |             |             |             |
|---------------|-------------------|-----------------------------|-------------|-------------|-------------|-------------|-------------|
|               |                   | Stage 1                     |             | Stage 2     |             | Stage 3     |             |
|               |                   | Ratio                       | P-value     | Ratio       | P-value     | Ratio       | P-value     |
| <i>VvHB27</i> | GSVIVT01003431001 | 4.996838111                 | 6.03E-09    | 4.39826087  | 4.55E-68    | 5.336307481 | 4.17E-11    |
| <i>VvHB39</i> | GSVIVT01004811001 | 268                         | 1.90E-08    | 185         | 3.23E-09    | 104         | 1.78E-07    |
| <i>VvHB59</i> | GSVIVT01007715001 | 70.75                       | 3.88E-05    | 34.25       | 0.000729715 | 277         | 4.07E-05    |
| <i>VvHB58</i> | GSVIVT01008065001 | 9.471451021                 | 1.12E-19    | 10.69092332 | 1.20E-120   | 6.157422081 | 3.43E-12    |
| <i>VvHB62</i> | GSVIVT01009083001 | 221.25                      | 1.33E-15    | 106.8888889 | 9.69E-29    | 14.25       | 0.01441004  |
| <i>VvHB63</i> | GSVIVT01009273001 | 28.66666667                 | 2.22E-12    | 32.64285714 | 6.47E-18    | 25.38235294 | 5.16E-13    |
| <i>VvHB64</i> | GSVIVT01009274001 | 31.26923077                 | 3.36E-08    | 7.95        | 4.54E-06    | 1.07480916  | 0.634675366 |
| <i>VvHB55</i> | GSVIVT01010600001 | 0.400440044                 | 3.12E-08    | 0.326139089 | 1.98E-30    | 3.207133059 | 0.001607896 |
| <i>VvHB40</i> | GSVIVT01012897001 | 2.561125445                 | 0.021634725 | 2.493445279 | 6.13E-25    | 5.813516098 | 3.75E-12    |
| <i>VvHB61</i> | GSVIVT01013388001 | 4.964356436                 | 9.18E-06    | 2.607907743 | 2.92E-11    | 2.888268156 | 0.013952167 |
| <i>VvHB3</i>  | GSVIVT01013790001 | 107.5                       | 4.54E-11    | 395         | 4.43E-09    | 125.75      | 1.18E-07    |
| <i>VvHB52</i> | GSVIVT01018247001 | 3.564453125                 | 0.004619071 | 2.63285834  | 6.78E-10    | 4.893867925 | 5.02E-05    |
| <i>VvHB18</i> | GSVIVT01019012001 | 257.2365591                 | 1.51E-72    | 4.00109529  | 3.09E-27    | 89.83076923 | 3.79E-48    |
| <i>VvHB17</i> | GSVIVT01019043001 | 0.234348076                 | 2.11E-05    | 0.236607143 | 1.76E-53    | 0.877865961 | 0.111375672 |
| <i>VvHB6</i>  | GSVIVT01019399001 | 7.384444444                 | 1.14E-14    | 6.815384615 | 2.77E-66    | 7.859916782 | 0.000134842 |
| <i>VvHB7</i>  | GSVIVT01019655001 | 79.48484848                 | 1.73E-34    | 1.971875    | 0.000108701 | 75.70689655 | 7.02E-16    |
| <i>VvHB5</i>  | GSVIVT01020033001 | 4.349232013                 | 2.74E-06    | 6.60952381  | 1.24E-67    | 6.493975904 | 2.55E-09    |
| <i>VvHB37</i> | GSVIVT01021144001 | 53.42857143                 | 2.06E-18    | 59.72727273 | 1.24E-21    | 6.019230769 | 0.013637546 |
| <i>VvHB38</i> | GSVIVT01021625001 | 4.19760479                  | 1.36E-05    | 0.171428571 | 5.19E-62    | 0.862393968 | 0.034097501 |
| <i>VvHB23</i> | GSVIVT01025193001 | 4.164133739                 | 0.000637408 | 2.213333333 | 8.14E-06    | 3.983122363 | 0.000234732 |

| Gene ID       | Gene locus ID     | Stages of ovule development |             |             |           |             |             |
|---------------|-------------------|-----------------------------|-------------|-------------|-----------|-------------|-------------|
|               |                   | Stage 1                     |             | Stage 2     |           | Stage 3     |             |
|               |                   | Ratio                       | P-value     | Ratio       | P-value   | Ratio       | P-value     |
| <i>VvHB21</i> | GSVIVT01026636001 | 4.815724816                 | 2.11E-07    | 3.422758621 | 5.58E-25  | 5.592682927 | 5.05E-09    |
| <i>VvHB20</i> | GSVIVT01026638001 | 5.581679389                 | 6.85E-08    | 5.438247012 | 1.74E-26  | 10.91623037 | 1.64E-11    |
| <i>VvHB54</i> | GSVIVT01027407001 | 30.39130435                 | 1.48E-21    | 9.941176471 | 4.32E-16  | 9.383900929 | 6.22E-13    |
| <i>VvHB53</i> | GSVIVT01027508001 | 8.577319588                 | 1.01E-15    | 6.553846154 | 2.09E-45  | 4.099156118 | 0.014826987 |
| <i>VvHB60</i> | GSVIVT01029396001 | 3.214285714                 | 0.004427312 | 2.898039216 | 9.15E-05  | 1.662337662 | 0.951488647 |
| <i>VvHB44</i> | GSVIVT01030605001 | 3.50502008                  | 0.000115857 | 2.040256176 | 1.10E-08  | 2.354679803 | 0.147958527 |
| <i>VvHB49</i> | GSVIVT01031241001 | 17.05555556                 | 2.02E-19    | 8.583333333 | 1.09E-30  | 15.01382488 | 2.94E-19    |
| <i>VvHB50</i> | GSVIVT01032491001 | 4.13152094                  | 3.71E-06    | 3.241618497 | 6.09E-26  | 4.300859599 | 3.85E-07    |
| <i>VvHB32</i> | GSVIVT01033481001 | 10.70779221                 | 6.99E-10    | 7.623188406 | 5.82E-19  | 28.23636364 | 0.000120755 |
| <i>VvHB16</i> | GSVIVT01035238001 | 0.111111111                 | 0.008867926 | 0.057220708 | 3.45E-17  | 0.658653846 | 0.08332567  |
| <i>VvHB15</i> | GSVIVT01035921001 | 8.721774194                 | 1.22E-17    | 5.461113899 | 1.91E-74  | 8.91973792  | 1.32E-18    |
| <i>VvHB25</i> | GSVIVT01037575001 | 17.57030016                 | 4.30E-31    | 16.32782369 | 1.72E-178 | 18.31573276 | 1.01E-30    |
| <i>VvHB56</i> | GSVIVT01038619001 | 376.8333333                 | 5.20E-29    | 226.1       | 3.07E-57  | 185         | 4.34E-38    |



Supplementary Table S7: Primer sequences used in expression analysis of the homeobox genes in grape

| Gene   | Gene ID (Accession No.)             |        | Forward and reverse primer sequence (5'~3')      |
|--------|-------------------------------------|--------|--------------------------------------------------|
| VvHB27 | GSVIVT01003431001<br>XM_003632428.2 | F<br>R | AAGTAGCCGTTTGGTTCC<br>GCTTCATTGTCGTGTTGG         |
| VvHB39 | GSVIVT01004811001<br>XM_002271908.2 | F<br>R | CTACCTAAAGAAGCCCG<br>GCATCCATAACCACAAAC          |
| VvHB59 | GSVIVT01007715001<br>XM_002282040.2 | F<br>R | TCCGATTACCACCACCCGC<br>GACCACCAAAGACGACGCC       |
| VvHB58 | GSVIVT01008065001<br>XM_002271656.3 | F<br>R | GAGAGGGGAAACTTGGAGGTGT<br>TTTGTGGGAGGGTCGGGGTAAT |
| VvHB62 | GSVIVT01009083001<br>XM_002285707.2 | F<br>R | GCAGGGTAAGAACAATGGAAAT<br>CCAAACTGATGCTGAAACGC   |
| VvHB63 | GSVIVT01009273001<br>XM_002285485.3 | F<br>R | GCCATACCCCTCAGAGACAG<br>GCCCAAACGATAAGCACC       |
| VvHB64 | GSVIVT01009274001<br>XM_002283511.2 | F<br>R | GCTTCAAACAACACAGCACTCT<br>GCAACGCTTTCTCAACAATC   |
| VvHB55 | GSVIVT01010600001<br>XM_010664205.1 | F<br>R | TGGGGAAGGATTATGGGCTG<br>CGGTAGAGATAGTGGACGGC     |
| VvHB40 | GSVIVT01012897001<br>XM_010658241.1 | F<br>R | AGTTGCTTTCGCTCACG<br>GCCATTACGGCTTCCATAG         |
| VvHB61 | GSVIVT01013388001<br>XM_002272384.2 | F<br>R | GTTGTTGGAGGAGGGAGTG<br>CTTGTGACCAGCGGATGC        |
| VvHB3  | GSVIVT01013790001<br>XM_002263277.2 | F<br>R | GCTCTTACGGAGGTTTGGTG<br>CAGTGCCGCTTTCGTTGAT      |
| VvHB52 | GSVIVT01018247001<br>XM_010663078.1 | F<br>R | TTGAAGCAGACGGAGGTGGAC<br>GAGGCGGGTGATGGAGAG      |
| VvHB18 | GSVIVT01019012001<br>XM_002272971.2 | F<br>R | GCCGAGAAGGAGATACGACG<br>CCCCATTCCATGCCACTAAC     |
| VvHB17 | GSVIVT01019043001<br>XM_002269634.2 | F<br>R | CTTTCCTTGTCCTATCCTCT<br>CTCATAACATTCACCGCT       |
| VvHB6  | GSVIVT01019399001<br>XM_002279194.3 | F<br>R | GGTTCATCAATGCGAGGGTG<br>TTGTCGTCGGGGTCTGTAG      |
| VvHB7  | GSVIVT01019655001<br>XM_002280012.2 | F<br>R | CCCTCGTCAGGTTGCCAT<br>GAATTAGTGTACCCGATCTCCG     |
| VvHB5  | GSVIVT01020033001<br>XM_002276853.2 | F<br>R | GCCTCCTAACTCTCTCAATCC<br>TCATCAGACAAATCATCCTCC   |

| Gene          | Gene ID (Accession No.)             | Forward and reverse primer sequence (5'~3') |                                                   |
|---------------|-------------------------------------|---------------------------------------------|---------------------------------------------------|
| VvHB37        | GSVIVT01021144001<br>XM_002273152.2 | F<br>R                                      | ATCAACCCATCTCTCATTTC<br>CTTCCTTATCTCATCCCTCG      |
| VvHB38        | GSVIVT01021625001<br>XM_002281832.3 | F<br>R                                      | CAGCAAACCCCAACACCT<br>GGCAGTCACGAAACCAAG          |
| VvHB23        | GSVIVT01025193001<br>XM_010652862.1 | F<br>R                                      | TGGCTCGTCAGTATGTTCGG<br>AAGTCCTGCCTGGTTTGC        |
| VvHB21        | GSVIVT01026636001<br>XM_002272827.2 | F<br>R                                      | GCAGGAGTCAGACTGGGAAATC<br>GCTGGCTCAAATCAGAGGTTATC |
| VvHB20        | GSVIVT01026638001<br>XM_002279906.2 | F<br>R                                      | GAAGGTGATGACAGACGC<br>TCAAAAATACGCTCAAGAAT        |
| VvHB54        | GSVIVT01027407001<br>XM_002262914.3 | F<br>R                                      | GTGAAGCAGACAACAGAGAC<br>TCAAGCAACCATCAACAGG       |
| VvHB53        | GSVIVT01027508001<br>XM_010663259.1 | F<br>R                                      | CTTTCACCTTTGGTTCTCTGT<br>GCACTCTCATCGTATTCT       |
| VvHB60        | GSVIVT01029396001<br>XM_002270976.2 | F<br>R                                      | AGACAAAACCCCAACTCATCG<br>ACAAGCAAATCTCTCGCACAT    |
| VvHB44        | GSVIVT01030605001<br>XM_010659009.1 | F<br>R                                      | GCGAATGGTCAAGACACAGG<br>GACAGGAGCATAAATCACGAAAG   |
| VvHB49        | GSVIVT01031241001<br>XM_002277895.2 | F<br>R                                      | CAGTGGAGAACAGTAACG<br>TCAATGTAGGCGGAGAC           |
| VvHB50        | GSVIVT01032491001<br>XM_002278836.3 | F<br>R                                      | GTGACTCCTACTTCCAAAATGC<br>CAACAAAGCCTCTCCCTCC     |
| VvHB32        | GSVIVT01033481001<br>XM_002275711.2 | F<br>R                                      | GACTGGAATTATTGGGAAGGGAC<br>CGAAGAAGGATGATGGCGAG   |
| VvHB16        | GSVIVT01035238001<br>XM_002268236.2 | F<br>R                                      | TCCCACAATCGTTACCAAAGC<br>TAGGACACATCCACCATCACC    |
| VvHB15        | GSVIVT01035921001<br>XM_010650411.1 | F<br>R                                      | GATTTGGTCCTCTTGTCCT<br>CAACTTTCCTTGTCCTCCTC       |
| VvHB25        | GSVIVT01037575001<br>XM_002275062.3 | F<br>R                                      | CCTGAGTGGAGGCGAAAG<br>AGCCAAGGCAGTGTATGATT        |
| VvHB56        | GSVIVT01038619001<br>XM_002271487.2 | F<br>R                                      | CAGTATCTGGAGTCTATTTTCG<br>GCTCTGAGTGCTTTGTAGTC    |
| Actin1        | NC_012010                           | F<br>R                                      | GATTCTGGTGATGGTGTGAGT<br>GACAATTTCCCGTTCAGCAGT    |
| EF1- $\alpha$ | NC_012012                           | F<br>R                                      | AGGAGGCAGCCAACTTCACC<br>CAAACCCTGCATCACCATTC      |
